# Supplementary material for: Rapid separation of cannabinoid isomer sets using differential mobility spectrometry and mass spectrometry
Source: Royal Society of Chemistry journal article supplement (doi:10.1039/d1an02327f), 2022-01-01
Supplement: d1an02327f1.pdf [file d1an02327f1.pdf]

Supplementary Information for  
Rapid separation of cannabinoid isomer sets using differential mobility  
spectrometry and mass spectrometry

Nour Mashmoushi,<sup>a,b</sup> J. Larry Campbell,<sup>a,c,d</sup> Robert di Lorenzo,<sup>e</sup> W. Scott Hopkins<sup>a,b,c,f\*</sup>

<sup>a</sup> Department of Chemistry, University of Waterloo, 200 University Avenue West, Waterloo, Ontario, N2L 3G1, Canada. E-mail: [shopkins@uwaterloo.ca](mailto:shopkins@uwaterloo.ca)

<sup>b</sup> Waterloo Institute of Nanotechnology, Waterloo N2L 3G1, Ontario, Canada.

<sup>c</sup> Watermine Innovation, Waterloo N0B 2T0, Ontario, Canada

<sup>d</sup> Bedrock Scientific, Milton L6T 6J9, Ontario, Canada

<sup>e</sup> SCIEX, 71 Four Valley Drive, Concord, Ontario, L4K 4V8, Concord, Ontario, Canada.

<sup>f</sup> Centre for Eye and Vision Research, New Territories 999077, Hong Kong

## Table of Contents

|                                                                                |     |
|--------------------------------------------------------------------------------|-----|
| Experimental and instrumental conditions.....                                  | 4   |
| Mass spectrometric analyses of cannabinoid ions .....                          | 4   |
| The addition of resolving gas.....                                             | 7   |
| The behavior of cannabinoid derivatives under various modifier conditions..... | 8   |
| Preferential solvation studies observed in acetone modifier conditions.....    | 10  |
| Sample temperature studies for cannabinoid isomers.....                        | 10  |
| Precursor ion studies of cannabinoid DMS peaks .....                           | 10  |
| Precursor ion studies of MeCN-modified conditions .....                        | 13  |
| IPA modifier studies .....                                                     | 15  |
| Quantification of Cannabinoid Derivatives .....                                | 20  |
| Quantification of the decarboxylated isomer sets.....                          | 215 |
| XYZ coordinates of optimized cannabinoid molecule structures.....              | 27  |
| [THC – H] <sup>-</sup> Bare Ion .....                                          | 27  |
| [CBD – H] <sup>-</sup> Bare Ion.....                                           | 27  |
| [CBC – H] <sup>-</sup> Bare Ion .....                                          | 28  |
| [THCA – H] <sup>-</sup> Bare Ion .....                                         | 29  |
| [CBDA – H] <sup>-</sup> Bare Ion .....                                         | 30  |
| [THC – H] <sup>-</sup> ... IPA .....                                           | 31  |
| [CBD – H] <sup>-</sup> ... IPA.....                                            | 32  |
| [CBC – H] <sup>-</sup> ... IPA .....                                           | 33  |
| [THCA – H] <sup>-</sup> ... IPA .....                                          | 34  |
| [CBDA – H] <sup>-</sup> ... IPA .....                                          | 36  |
| [THC – H] <sup>-</sup> ... MeOH.....                                           | 37  |
| [CBD – H] <sup>-</sup> ... MeOH .....                                          | 38  |
| [CBC – H] <sup>-</sup> ... MeOH.....                                           | 39  |
| [THCA – H] <sup>-</sup> ... MeOH.....                                          | 40  |
| [CBDA – H] <sup>-</sup> ... MeOH .....                                         | 41  |
| [THC – H] <sup>-</sup> ... MeCN.....                                           | 42  |
| [CBD – H] <sup>-</sup> ... MeCN.....                                           | 43  |
| [CBC – H] <sup>-</sup> ... MeCN.....                                           | 44  |
| [THCA – H] <sup>-</sup> ... MeCN.....                                          | 45  |

|                                               |    |
|-----------------------------------------------|----|
| [CBDA – H] <sup>-</sup> ∙ ∙ MeCN.....         | 46 |
| [THC – H] <sup>-</sup> ∙ ∙ Acetic acid.....   | 47 |
| [CBD – H] <sup>-</sup> ∙ ∙ Acetic Acid .....  | 48 |
| [CBC – H] <sup>-</sup> ∙ ∙ Acetic Acid .....  | 49 |
| [THCA – H] <sup>-</sup> ∙ ∙ Acetic Acid.....  | 50 |
| [CBDA – H] <sup>-</sup> ∙ ∙ Acetic Acid ..... | 51 |
| [THC – H] <sup>-</sup> ∙ ∙ ACE.....           | 53 |
| [CBD – H] <sup>-</sup> ∙ ∙ ACE .....          | 54 |
| [CBC – H] <sup>-</sup> ∙ ∙ ACE.....           | 55 |
| [THCA – H] <sup>-</sup> ∙ ∙ ACE.....          | 56 |
| [CBDA – H] <sup>-</sup> ∙ ∙ ACE.....          | 57 |

## Experimental and instrumental conditions

**Table S1.** Instrumental conditions used for the separation of cannabinoid isomers

| <b>Source/Gas Conditions</b>    |                                                |                           |         |
|---------------------------------|------------------------------------------------|---------------------------|---------|
| <b>Ion Source:</b>              | TurboSpray                                     | <b>Temperature:</b>       | 34 °C   |
| <b>Curtain Gas:</b>             | 20 psi                                         | <b>Ion Source Gas 1:</b>  | 20 psi  |
| <b>Collision Gas:</b>           | High                                           | <b>Ion Source Gas 2:</b>  | 0 psi   |
| <b>Polarity:</b>                | Negative Mode                                  | <b>Ion Spray Voltage:</b> | -4500 V |
| <b>Compound Conditions</b>      |                                                |                           |         |
| <b>Declustering Potential:</b>  | -100.0 V                                       | <b>Excitation Energy:</b> | 0.100 V |
| <b>Collision Energy:</b>        | -10.0 V                                        | <b>CE Spread:</b>         | 0.00 V  |
| <b>Entrance Potential:</b>      | -10.0 V                                        |                           |         |
| <b>DMS Conditions</b>           |                                                |                           |         |
| <b>DMS Temperature*:</b>        | 150 °C for decarboxylated<br>225 °C for acids, | <b>CV Ramp:</b>           | 0.1 V   |
| <b>DMS Offset:</b>              | -3.0 V                                         | <b>Resolving Gas:</b>     | 20      |
| <b>Modifier at 1.5% (v/v*):</b> | IPA                                            |                           |         |

\*An equilibration time of 15 min is given when modifying the DMS temperature prior to any experiments being run, or when a modifier is newly introduced.

## Mass spectrometric analyses of cannabinoid ions

The cannabinoid derivatives were analyzed in the negative mode to improve the total parent  $m/z$  ion signal, increasing sensitivity. Protonation of some of the isomers results in lower ionization efficiencies for some derivatives. Product ion scans of  $\Delta^9$ -THC and CBC in the protonated and deprotonated cases are provided to showcase the relative ionization efficiencies of each parent ion  $m/z$  peak.

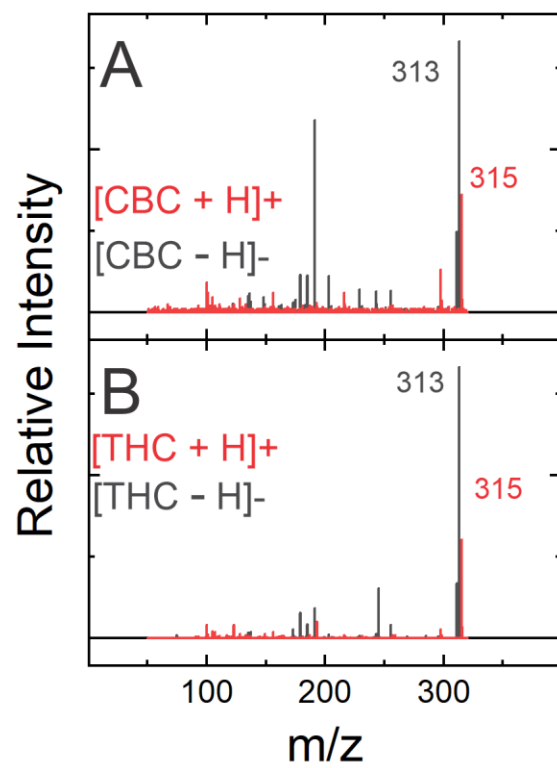

**Figure S1.** Product ion scans of protonated and deprotonated (A) CBC and (B)  $\Delta^9$ -THC.

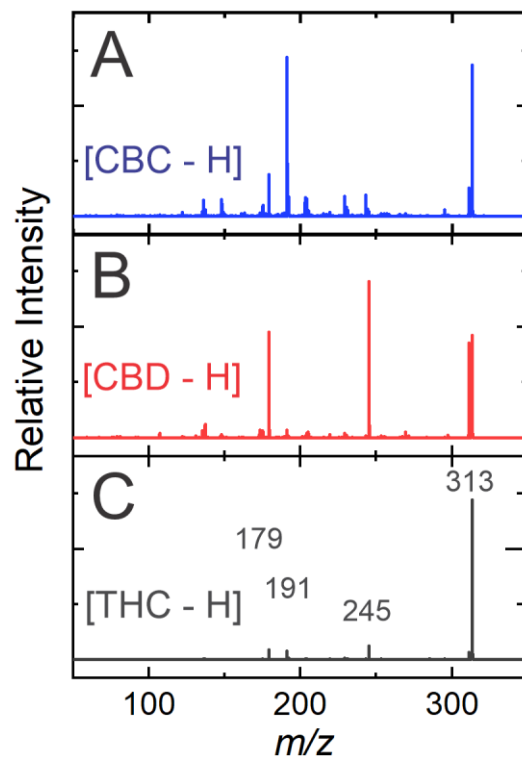

**Figure S2.** Enhanced product ion scans of (A)  $[[CBC - H]^-$ , (B)  $[CBD - H]^-$  and (C)  $[\Delta^9\text{-THC} - H]^-$ , using a collision energy of  $-30$  V show similar product ions but variation in product ion relative intensities.

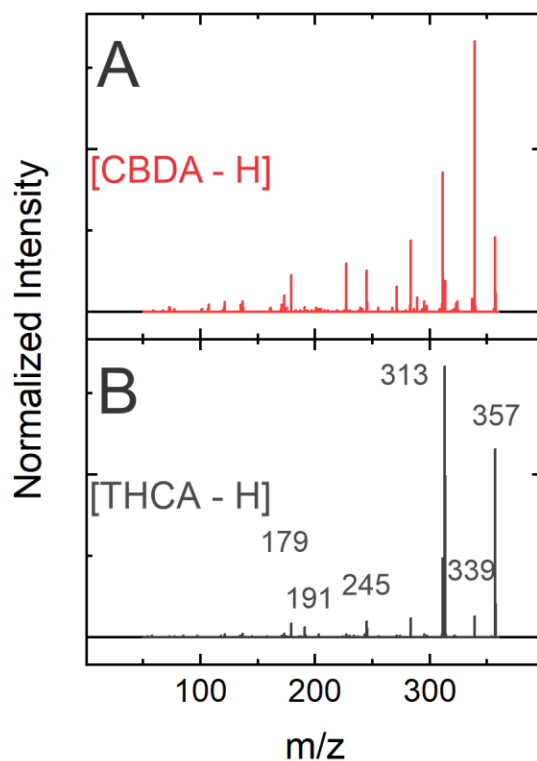

**Figure S3.** Enhanced product ion scans of (A)  $[CBDA - H]^-$  and (B)  $[THCA - H]^-$  using a collision energy of  $-30$  V show similar product ions but variation in product ion relative intensities.

**The addition of resolving gas**

The resolving gas (DR) is  $N_2$  gas added at a determined flow rate to the end of the DMS cell to extend the ion residence time in the DMS cell, improving the resolution. The flow rate and ion residence time attributed to each DR value are tabulated below.

**Table S2.** Resolving gas conditions and corresponding flow rate and residence times

| DR value: | Flow rate ( $cm^3/ms$ ): | Ion residence time (ms): |
|-----------|--------------------------|--------------------------|
| 8         | 0.014966                 | 9.463722                 |
| 10        | 0.016833                 | 10.05587                 |
| 12        | 0.018617                 | 10.69519                 |
| 14        | 0.020283                 | 11.37081                 |
| 16        | 0.021883                 | 12.10491                 |
| 18        | 0.023367                 | 12.87554                 |
| 20        | 0.024900                 | 13.78254                 |
| 22        | 0.026333                 | 14.75410                 |

## The behavior of cannabinoid derivatives under various modifier conditions

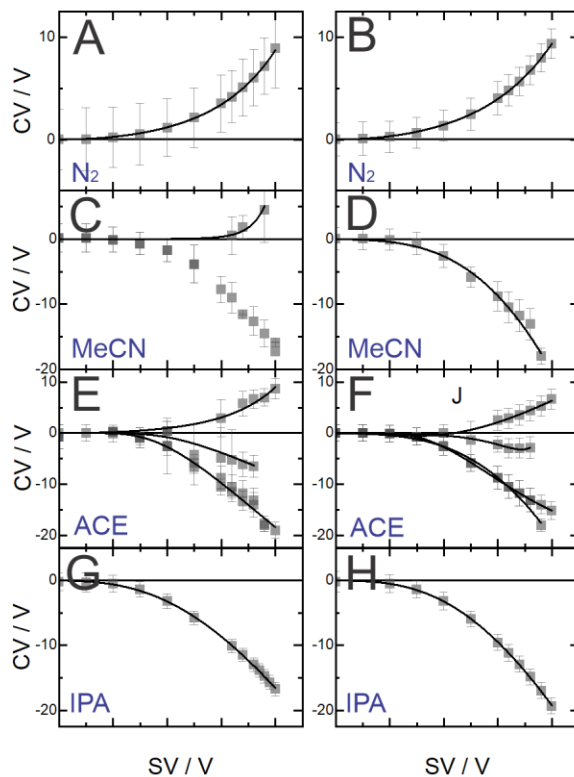

**Figure S4.** The dispersion plots of CBD (*left*) and CBC (*right*) in (A) and (B) N<sub>2</sub> conditions, (C) and (D) MeCN-modified conditions, (E) and (F) acetone-modified conditions, and (G) and (H) IPA-modified conditions.



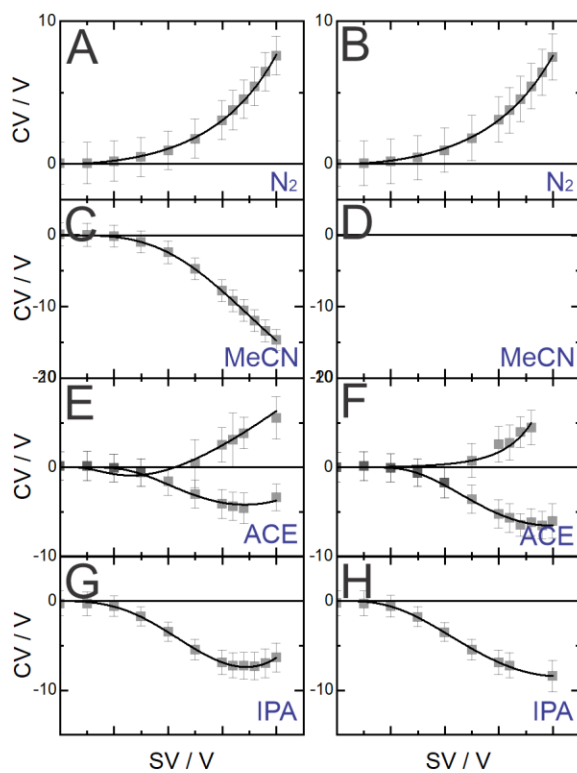

**Figure S5.** The dispersion plots of CBDA (*left*) and (-)-THCA (*right*) in (A) and (B)  $N_2$  conditions, (C) and (D) MeCN-modified conditions, (E) and (F) acetone-modified conditions, and (G) and (H) IPA-modified conditions.

## Preferential solvation studies observed in acetone modifier conditions

### Sample temperature studies for cannabinoid isomers

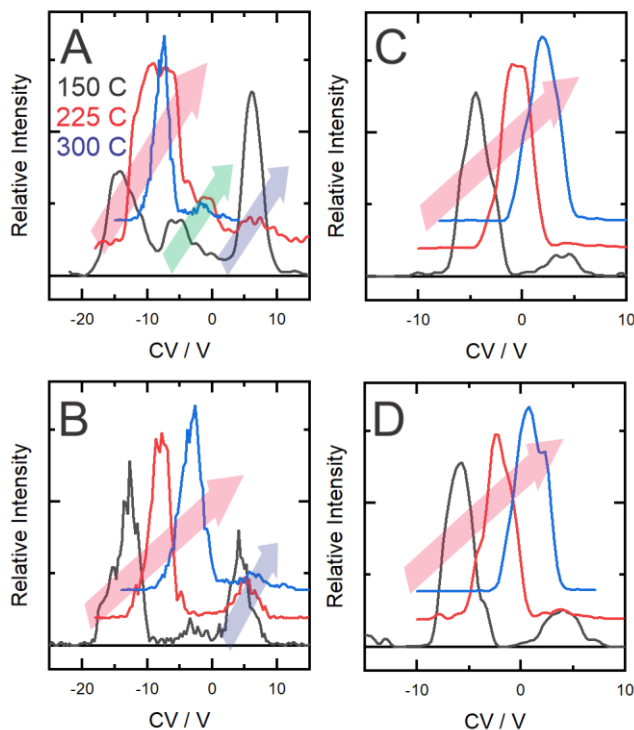

**Figure S6.** Temperature studies of (A) CBD, (B) CBC, (C) CBDA, and (D) THCA anions under  $N_2$  seeded with 1.5% acetone vapor taken at  $SV = 3600$  V.

### Precursor ion studies of cannabinoid DMS peaks

Precursor ion scans were taken for each SV/CV pair noted in the previous figures for the decarboxylated anion species. Agreement with solvent studies were found, in which peak I consistently contained a  $m/z$  429 peak, pertaining to the deprotonated analyte clustered with 2 acetone molecules. Peak II contained a  $m/z$  373 peak, corresponding to the deprotonated analyte clustered with acetic acid. Peak III showed a  $m/z$  627 peak, likely indicated a proton-bound dimer of the deprotonated analyte with its neutral counterpart. It is noted that even though solvent studies showed dependence of peak intensity of peaks III and IV on methanol and acetonitrile, respectively, precursor ion scans did not show peaks corresponding to these.

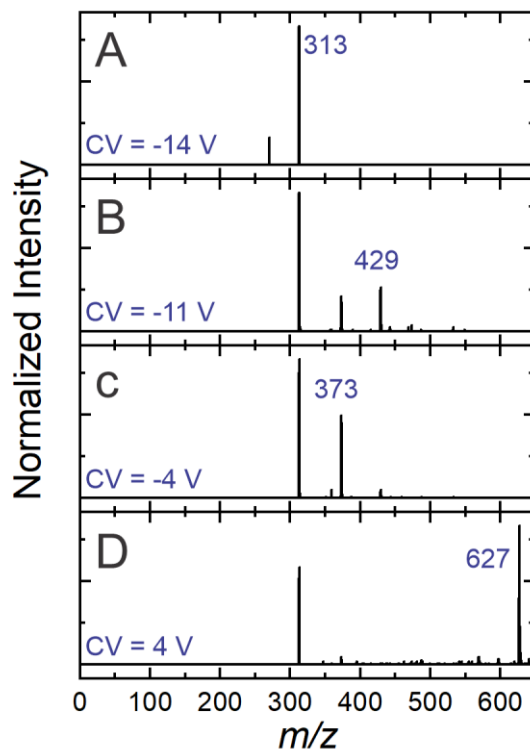

**Figure S7.** Precursor ion scans of peaks I-IV taken at DcP set to 0 V for  $[THC - H]^-$  in an  $N_2$  carrier gas environment seeded with 1.5% (v/v) acetone. Ions of interest are labelled.

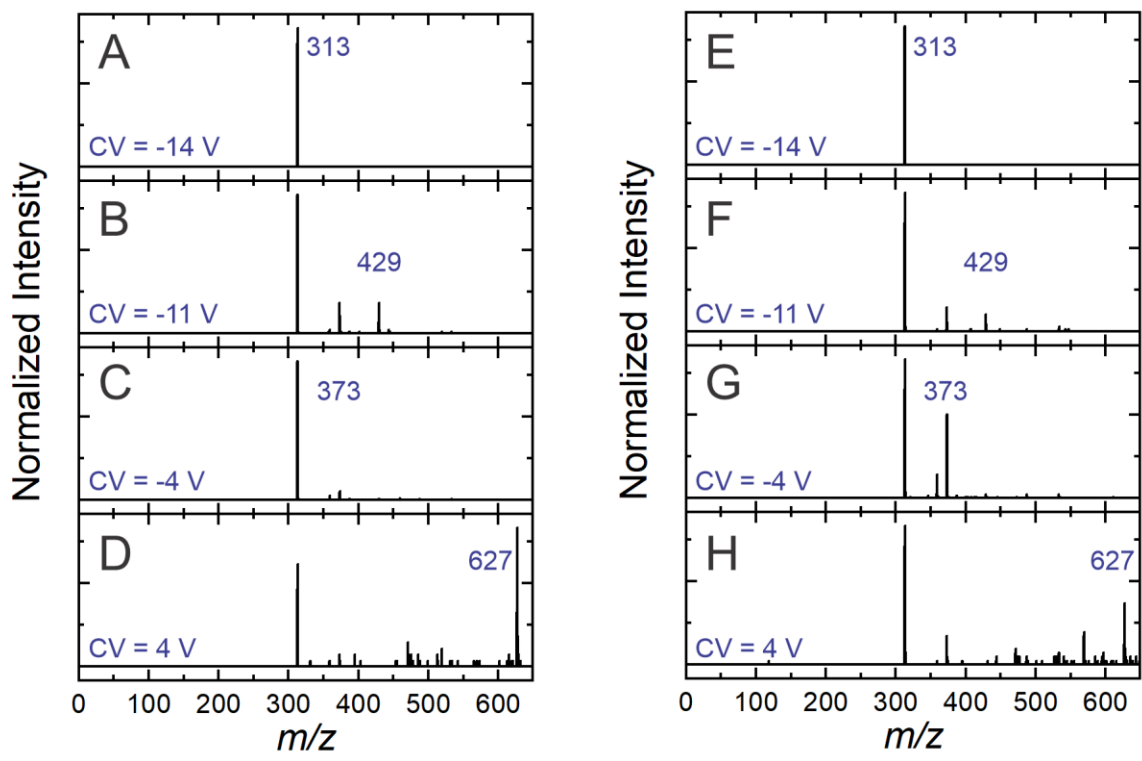

**Figure S8.** Precursor ion scans of peaks I-IV taken at DcP set to 0 V for  $[CBD - H]^-$  (A – D) and  $[CBC - H]^-$  (E – H) in an  $N_2$  carrier gas environment seeded with 1.5% (v/v) acetone. Ions of interest are labelled.

## Precursor ion studies of MeCN-modified conditions

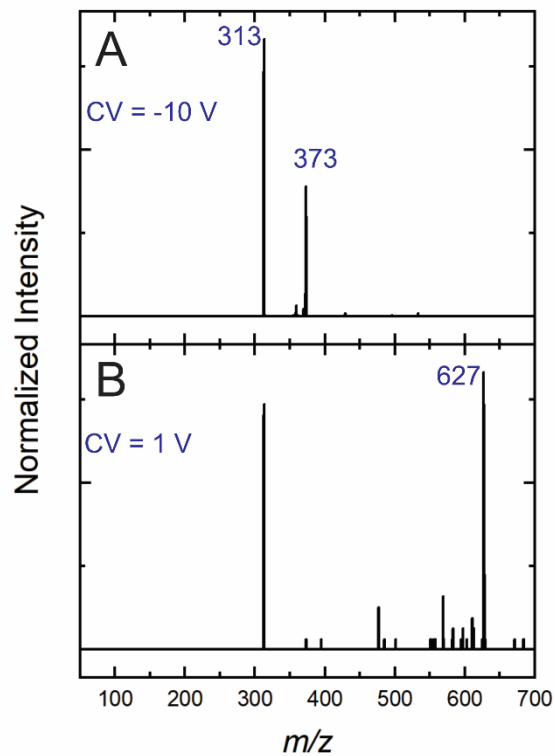

**Figure S 9.** Precursor ion scans of deprotonated THC in  $N_2$  seeded with 1.5% (v/v) MeCN at  $SV = 3600$  V for the ion populations at (A)  $CV = -10$  V and (B)  $CV = 1$  V. The ion population at  $CV = -10$  V includes an adduct with acetic acid, while the ion population at  $CV = 1$  V includes a THC dimer.

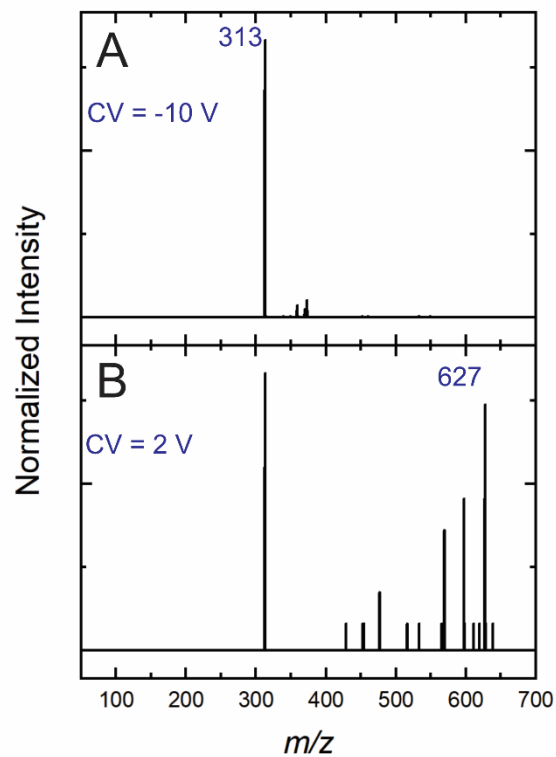

**Figure S10.** Precursor ion scans of deprotonated CBD in  $N_2$  seeded with 1.5% (v/v) MeCN at  $SV = 3600$  V for the ion populations at (A)  $CV = -10$  V and (B)  $CV = 2$  V. The ion population at  $CV = 2$  V includes a CBD dimer.

## IPA modifier studies

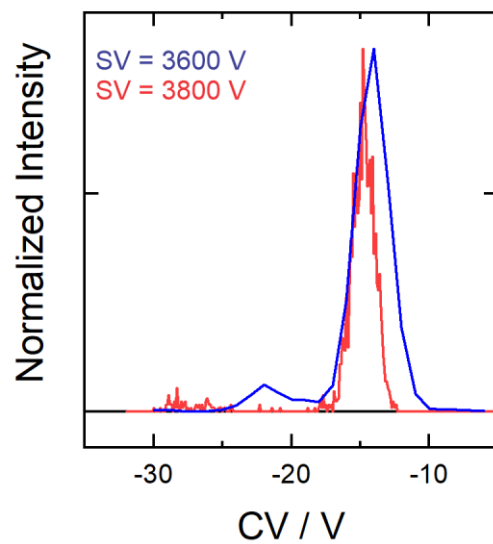

**Figure S11.** Ionogram of [THC - H]<sup>-</sup> taken under N<sub>2</sub> gas conditions seeded with 1.5% (v/v) IPA at T = 150 °C at SV = 3600 V (*blue*) and SV = 3800 V (*red*) shows the disappearance of the minor ionogram peak with increasing SV.

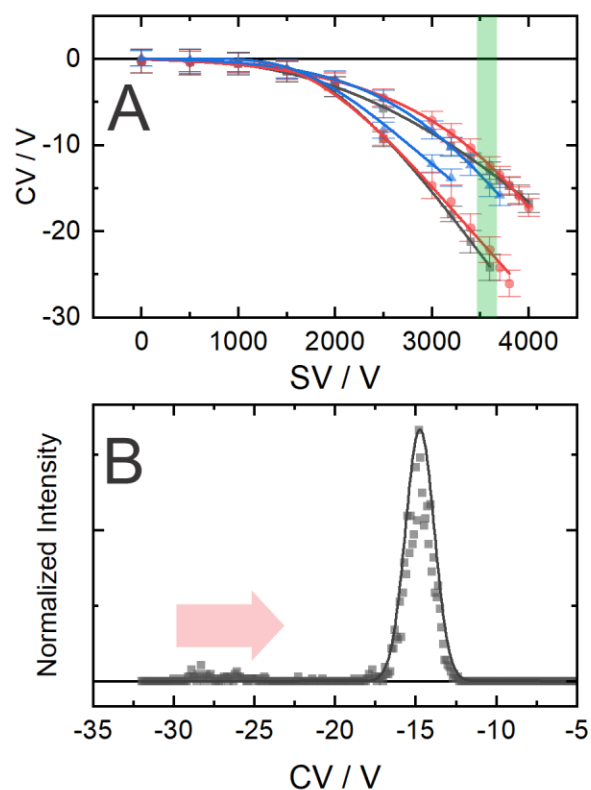

**Figure S12.** (A) Dispersion plots of  $[\text{CBD} - \text{H}]^-$  taken under  $\text{N}_2$  gas conditions seeded with 1.5% (v/v) IPA at  $T = 150\text{ }^\circ\text{C}$  (*black*),  $T = 225\text{ }^\circ\text{C}$  (*red*), and  $T = 300\text{ }^\circ\text{C}$  (*blue*). (B) The ionogram of  $[\text{CBD} - \text{H}]^-$  under  $\text{N}_2$  gas conditions seeded with 1.5% (v/v) IPA at  $T = 150\text{ }^\circ\text{C}$  and  $\text{SV} = 3800\text{ V}$ . As temperature is increased, the dominant peak does not change significantly in DMS behavior, while the minor peak trends towards weaker clustering.



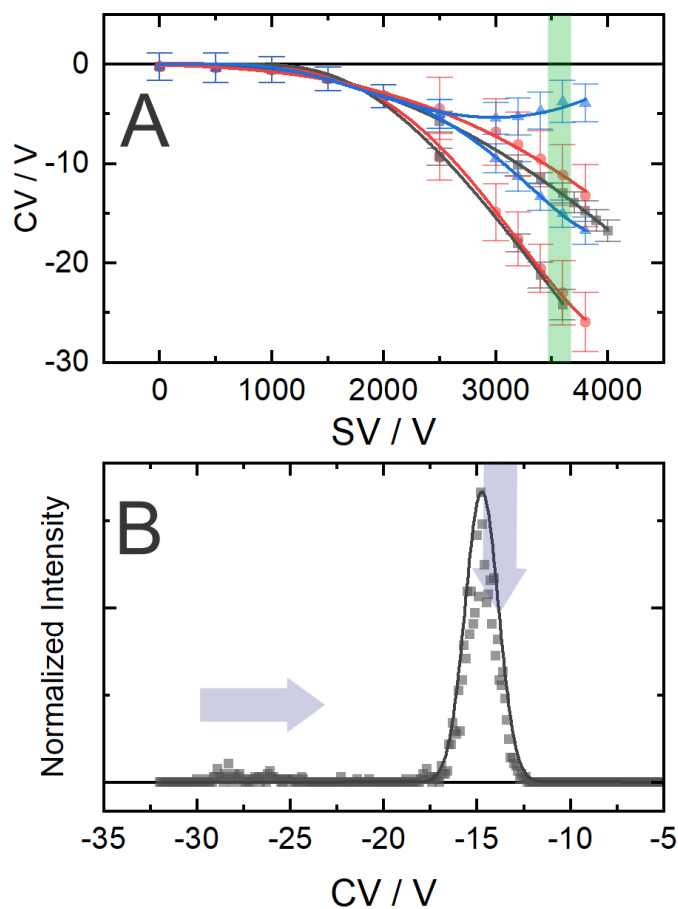

**Figure S13.** (A) Dispersion plots of  $[CBD - H]^-$  taken under  $N_2$  gas conditions seeded with 0.6% (v/v) IPA (*black*), 0.3% (v/v) IPA (*red*), and 1.5% (v/v) IPA (*blue*) at  $T=150$  °C. (B) The ionogram of  $[CBD - H]^-$  under  $N_2$  gas conditions seeded with 1.5% (v/v) IPA at  $T=150$  °C and  $SV = 3800$  V. As the concentration of IPA reduces in the carrier gas, the dominant peak decreases in intensity while the minor peak shifts towards weaker clustering.

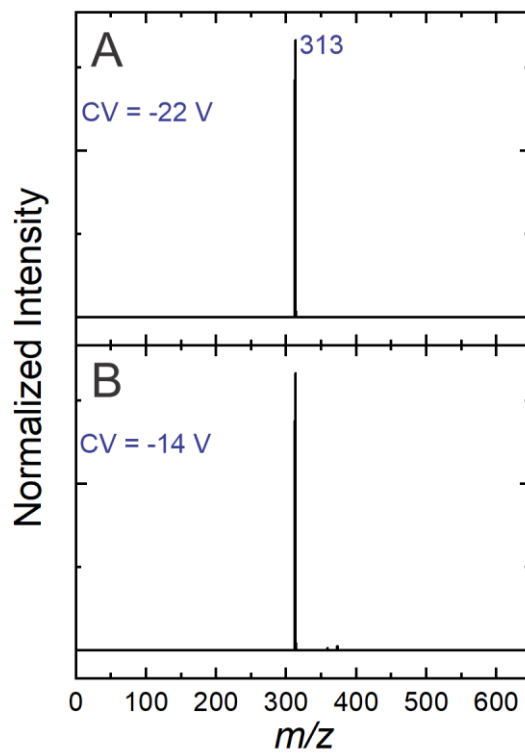

**Figure S14.** Precursor ion scans of peaks I and II taken at DcP set to 0 V for  $[THC - H]^-$  in an  $N_2$  carrier gas environment seeded with 1.5% (v/v) IPA at CV = -22 V (**A**) and CV = -14 V (**B**). No  $m/z$  ion peak other than the parent ion mass is detected.

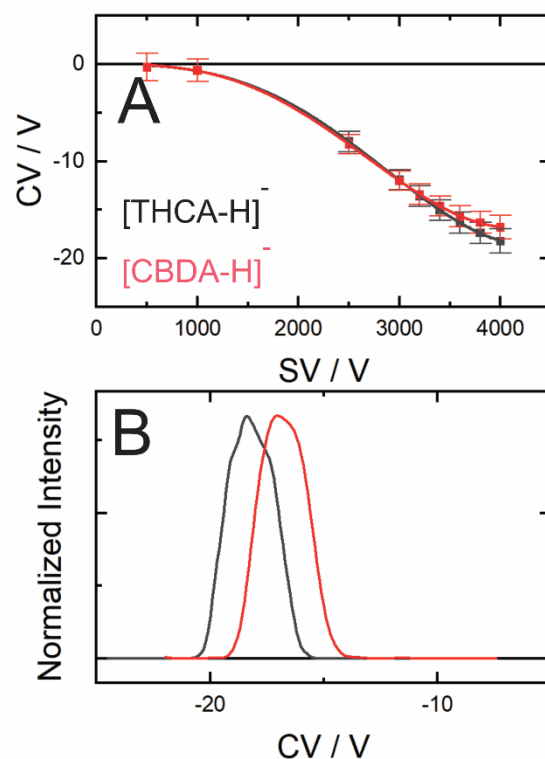

**Figure S15.** (A) Dispersion plots of deprotonated (–)-THCA (*black*) and CBDA (*red*) under an N<sub>2</sub> seeded with 1.5% (*v/v*) IPA at T = 150 °C shows inadequate separation at high SV. (B) An ionogram taken at SV = 4000 V of the two isomers with resolving gas shows insufficient separation at these conditions.

**Table S3.** Computed binding energies (*kJ mol*<sup>-1</sup>) of adducts formed between anionic cannabinoid molecules, [M – H]<sup>-</sup>, and neutral solvent molecules at T = 298 K.

| Cannabinoid     | Binding Energy |      |      |      |      |
|-----------------|----------------|------|------|------|------|
|                 | MeOH           | MeCN | ACE  | IPA  | AA   |
| $\Delta^9$ -THC | 32.6           | 22.7 | 17.4 | 34.1 | 93.0 |
| CBD             | 37.5           | 28.7 | 17.9 | 43.4 | 78.3 |
| CBC             | 35.2           | 14.3 | 7.5  | 49.2 | 85.6 |
| (–)-THCA        | 21.6           | 9.4  | 5.3  | 19.6 | 67.1 |
| CBDA            | 10.6           | 10.1 | 2.3  | 11.8 | 37.1 |

## Quantification of Cannabinoid Derivatives

The standard addition method for THCA yielded precise results, allowing for the quantification of THCA using this method. In the case of CBDA, due to the effect of ionization efficiency, the use of an internal standard is better suited for calibration, to account for the ionization efficiency occurring. An internal standard calibration curve is shown for the case of CBDA. Accurate measurements of CBDA were achieved using this method. A calibration plot of CBDA is also provided to determine the LOD and LOQ values using the separation methods employed.

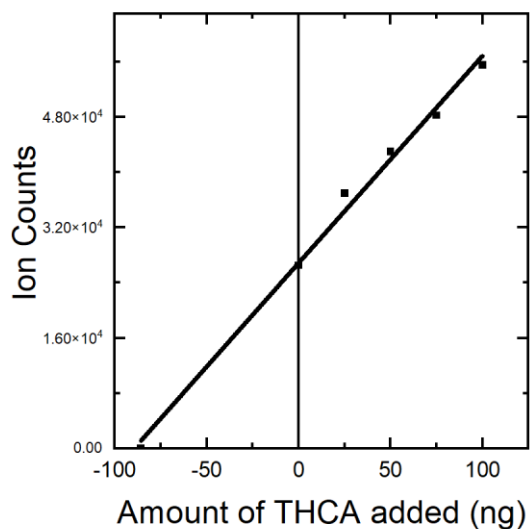

**Figure S16.** Standard addition calibration curve of THCA in marijuana flower extract Blueberry Haze

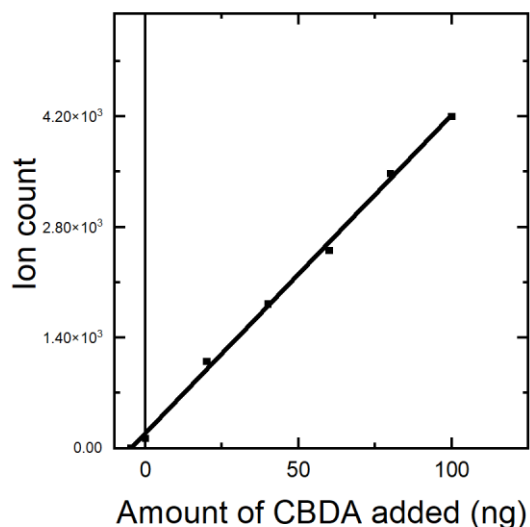

**Figure S17.** Standard addition calibration curve of CBDA in marijuana flower extract Blueberry Haze

**Table S4.** LOD and LOQ of the proposed method and accuracy determination

| <b>Isomer</b>   | <b>LOD<br/>(ng/mL)</b> | <b>LOQ<br/>(ng/mL)</b> | <b>R<sup>2</sup></b> |
|-----------------|------------------------|------------------------|----------------------|
| <b>(-)-THCA</b> | 13                     | 41                     | 0.993                |
| <b>CBDA</b>     | 7                      | 21                     | 0.996                |

A second marijuana extra (Pure Sun) was acquired and extracted using the methods mentioned previously. A 200 ng/mL concentration of flower to solvent was used in the quantification of THCA and CBDA in the extract. The concentration of the two carboxylated isomers was determined using standard addition.

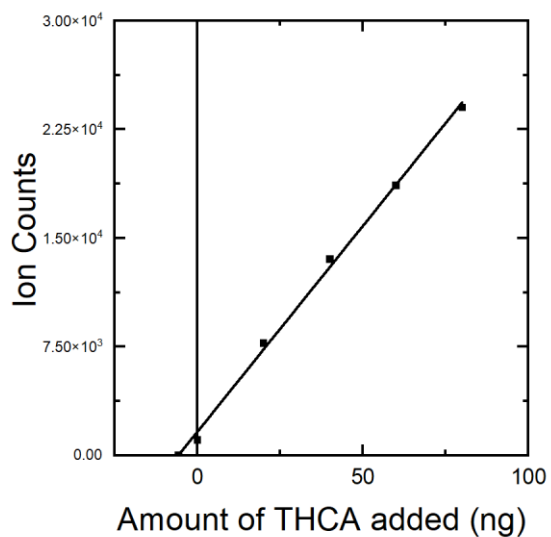

**Figure S18.** Standard addition calibration curve of THCA in marijuana flower extract Pure Sun

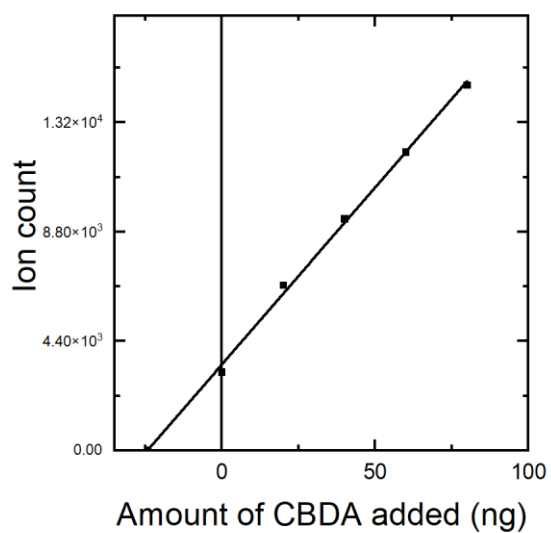

**Figure S19.** Standard addition calibration curve of CBDA in marijuana flower extract Pure Sun

**Table S5.** Calculated results from quantification of Pure Sun Marijuana extract

| Isomer   | Expected (w/w) Percentage (%) | Calculated (w/w) Percentage (%) | R <sup>2</sup> |
|----------|-------------------------------|---------------------------------|----------------|
| (-)-THCA | 0-2                           | 2.8 ± 0.06                      | 0.997          |
| CBDA     | 10-15                         | 12.1 ± 0.2                      | 0.997          |

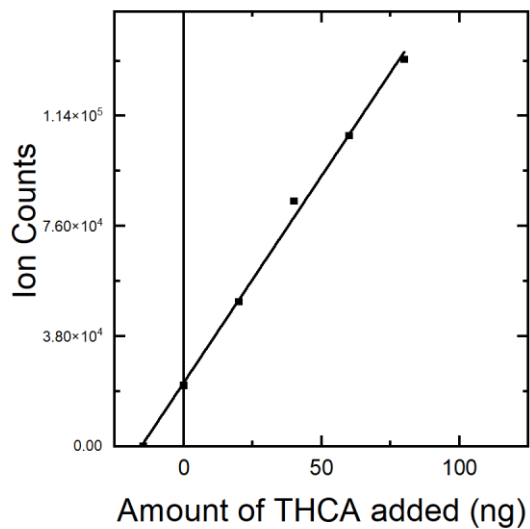

**Figure S20.** Standard addition calibration curve of THCA in marijuana flower extract Skunky Haze

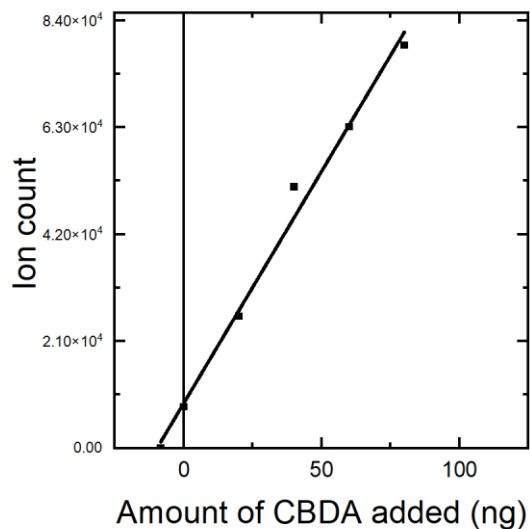

**Figure S21.** Standard addition calibration curve of CBDA in marijuana flower extract Skunky Haze

**Table S6.** Calculated results from quantification of Skunky Haze Marijuana extract

| Isomer   | Expected (w/w) Percentage (%) | Calculated (w/w) Percentage (%) | R <sup>2</sup> |
|----------|-------------------------------|---------------------------------|----------------|
| (-)-THCA | 7-12                          | 7.3 ± 0.06                      | 0.995          |
| CBDA     | 7-12                          | 4.2 ± 0.04                      | 0.987          |

### Quantification of the decarboxylated isomer sets

The amounts of THC, CBD, and CBC were negligible in the marijuana flower extract tested, as expected. To test the accuracy of quantifying these isomers using the developed method, a 1:1:1 standard mixture of a predetermined concentration of each isomer was measured in the DMS and quantified via standard addition. A summary of the accuracy of the quantification step is provided in Table S7.

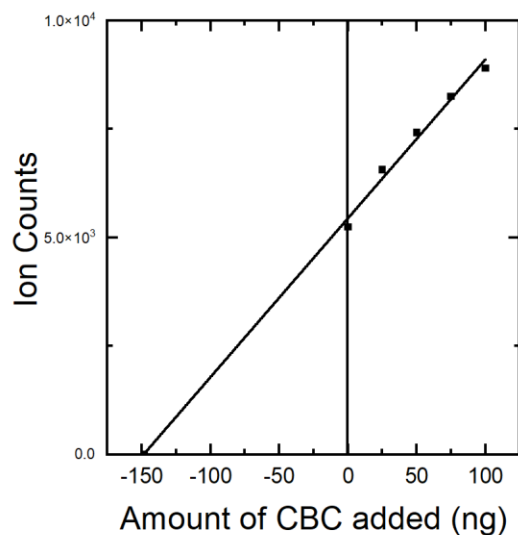

Figure S22. Standard addition calibration curve of CBC in standard mixture



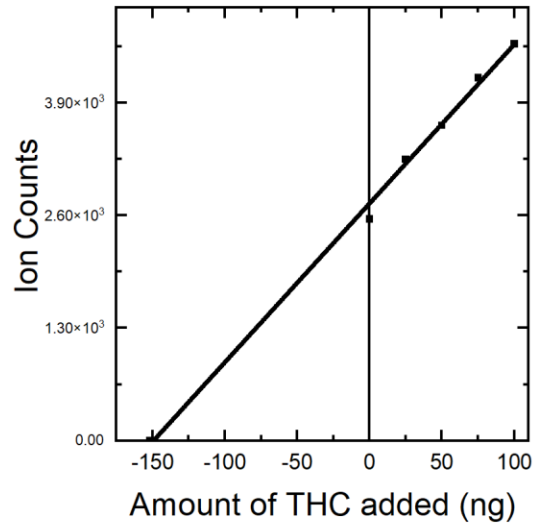

Figure S23. Standard addition calibration curve of THC in standard mixture

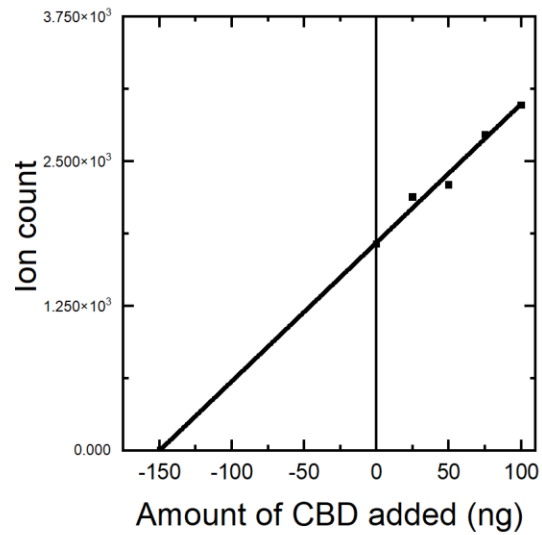

Figure S24. Standard addition calibration curve of CBD in standard mixture

**Table S7.** Calculated results from quantification of THC, CBD, and CBC standard mixture

| <b>Isomer</b> | <b>Concentration<br/>in Sample<br/>(ng/mL)</b> | <b>Measured<br/>Concentration<br/>(ng/mL)</b> | <b>LOD<br/>(ng/mL)</b> | <b>LOQ<br/>(ng/mL)</b> | <b>R<sup>2</sup></b> |
|---------------|------------------------------------------------|-----------------------------------------------|------------------------|------------------------|----------------------|
| <b>THC</b>    | 150                                            | 152.0                                         | 7                      | 23.9                   | 0.990                |
| <b>CBD</b>    | 150                                            | 149.0                                         | 18.9                   | 57.2                   | 0.978                |
| <b>CBC</b>    | 150                                            | 148.2                                         | 18.4                   | 55.7                   | 0.982                |

## XYZ coordinates of optimized cannabinoid molecule structures

### [THC – H]<sup>+</sup> Bare Ion

|   |             |             |             |
|---|-------------|-------------|-------------|
| O | -0.61031800 | -1.98794800 | 0.61960700  |
| O | -0.26015400 | 1.65800400  | -2.51377800 |
| C | -2.50404000 | -0.51109900 | 0.58916700  |
| C | -1.95818700 | 0.27847300  | -0.61287300 |
| C | -2.05078600 | -1.98283200 | 0.53781300  |
| C | -4.00602300 | -0.23558200 | 0.72896200  |
| C | -0.49269000 | -0.03453000 | -0.84837800 |
| C | -4.23120600 | 1.24928900  | 1.06761400  |
| C | -2.27550800 | 1.74925500  | -0.41274400 |
| C | -3.29508300 | 2.18880800  | 0.33403500  |
| C | 0.09633100  | -1.13201000 | -0.22821500 |
| C | -2.48963200 | -2.76451000 | 1.77912000  |
| C | -2.48939500 | -2.72201000 | -0.73620300 |
| C | 0.27445300  | 0.73834500  | -1.81534400 |
| C | 1.44595000  | -1.46880300 | -0.40013300 |
| C | 2.23271400  | -0.68137000 | -1.25092700 |
| C | -3.57989900 | 3.65902600  | 0.51434800  |
| C | 1.66267100  | 0.38522200  | -1.93485800 |
| C | 3.70852700  | -0.99636900 | -1.42366700 |
| C | 4.65712800  | 0.02950200  | -0.76883100 |
| C | 4.53304000  | 0.10947000  | 0.75583200  |
| C | 5.44700700  | 1.16459700  | 1.38886300  |
| C | 5.32805200  | 1.23386600  | 2.91512000  |
| H | -2.01258200 | -0.10570900 | 1.48506100  |
| H | -2.51797300 | -0.02886400 | -1.51457000 |
| H | -4.46412000 | -0.85818600 | 1.50476000  |
| H | -4.51069500 | -0.47739400 | -0.21414600 |
| H | -4.10887400 | 1.40211300  | 2.15180700  |
| H | -5.27345400 | 1.52778600  | 0.85435500  |
| H | -1.63721700 | 2.43599100  | -0.95755800 |
| H | -2.22833000 | -2.21735400 | 2.68907200  |
| H | -3.56685800 | -2.94922900 | 1.77518200  |
| H | -1.97375100 | -3.72806100 | 1.80092200  |
| H | -3.57913600 | -2.71341300 | -0.83950000 |
| H | -2.05255200 | -2.26297900 | -1.62403000 |
| H | -2.15410800 | -3.76217100 | -0.69186700 |
| H | 1.84609800  | -2.33490200 | 0.11471200  |
| H | -3.55031900 | 3.94477400  | 1.57526100  |
| H | -4.58207000 | 3.92268700  | 0.14862100  |
| H | -2.85128500 | 4.27088100  | -0.02188300 |
| H | 3.91967200  | -1.99074600 | -1.01025700 |
| H | 3.94738200  | -1.04643300 | -2.49336700 |
| H | 4.45386100  | 1.01775000  | -1.19735500 |
| H | 5.69481800  | -0.22041600 | -1.03473900 |
| H | 3.49085300  | 0.32128700  | 1.01642200  |
| H | 4.76126300  | -0.87404400 | 1.19038700  |
| H | 5.20856300  | 2.14648200  | 0.96170900  |
| H | 6.49047300  | 0.95874000  | 1.11420100  |
| H | 5.59235500  | 0.27556600  | 3.37528700  |
| H | 5.98653000  | 1.99975000  | 3.33852800  |
| H | 4.30300500  | 1.47013300  | 3.21726300  |
| H | 2.25169100  | 0.97508000  | -2.63310300 |

### [CBD – H]<sup>+</sup> Bare Ion

|   |             |             |             |
|---|-------------|-------------|-------------|
| O | -1.01488400 | -1.27162600 | -1.64537300 |
| O | -0.01983700 | 0.21378700  | 2.77759800  |
| C | -2.22284500 | 1.24928900  | -0.40857000 |
| C | -1.94670300 | 0.13844000  | 0.66767300  |

|   |             |             |             |
|---|-------------|-------------|-------------|
| C | -3.70997800 | 1.30789300  | -0.78431300 |
| C | -4.23688900 | -0.05784400 | -1.23318300 |
| C | -2.98399800 | -0.96126500 | 0.68161500  |
| C | -0.56616000 | -0.49798600 | 0.56824200  |
| C | -3.99561400 | -1.10672300 | -0.17596200 |
| C | -1.64336400 | 2.59192900  | 0.01244100  |
| C | -0.13696800 | -1.18235000 | -0.56257800 |
| C | 0.31497100  | -0.40876600 | 1.72207700  |
| C | -4.90983000 | -2.30191700 | -0.17466900 |
| C | -0.16559400 | 2.61475200  | 0.31980400  |
| C | 2.00613800  | -1.68662600 | 0.42943900  |
| C | 1.12931600  | -1.77109000 | -0.66562700 |
| C | 1.60517100  | -1.03501200 | 1.58214300  |
| C | 3.40765300  | -2.24905100 | 0.30191700  |
| C | -2.37092800 | 3.71142800  | 0.11767400  |
| C | 4.31496200  | -1.41139700 | -0.62367000 |
| C | 4.51749300  | 0.02647800  | -0.13907500 |
| C | 5.36772100  | 0.87580200  | -1.08813700 |
| C | 5.55935400  | 2.31304100  | -0.59291100 |
| H | -1.68298100 | 0.95237100  | -1.31419800 |
| H | -1.95869400 | 0.60811800  | 1.65826400  |
| H | -3.86045600 | 2.04879000  | -1.57779900 |
| H | -4.29740200 | 1.63693200  | 0.08152200  |
| H | -3.74623500 | -0.36203700 | -2.16952200 |
| H | -5.31113800 | 0.01176900  | -1.45356000 |
| H | -2.81102200 | -1.72008400 | 1.44231600  |
| H | -5.95976100 | -2.00666300 | -0.04072600 |
| H | -4.64913500 | -3.00876500 | 0.61768900  |
| H | -4.85522400 | -2.83586700 | -1.13376500 |
| H | 0.40695700  | 2.08688800  | -0.44874200 |
| H | 0.20253100  | 3.64201200  | 0.39798000  |
| H | 0.03329400  | 2.10045700  | 1.26541400  |
| H | 1.41981200  | -2.28939000 | -1.57735000 |
| H | 2.27623600  | -0.95498700 | 2.43265500  |
| H | 3.86806800  | -2.30785600 | 1.29491100  |
| H | 3.36441200  | -3.27463700 | -0.08739300 |
| H | -1.90549400 | 4.64794900  | 0.41137300  |
| H | -3.43834800 | 3.74273600  | -0.06279000 |
| H | 3.87236400  | -1.39031200 | -1.62711100 |
| H | 5.29207300  | -1.90615500 | -0.72143100 |
| H | 3.53780500  | 0.49524700  | -0.00130500 |
| H | 4.98506700  | 0.01122400  | 0.85499000  |
| H | -0.56487800 | -1.76037700 | -2.34042900 |
| H | 4.89191400  | 0.89134800  | -2.07696900 |
| H | 6.34861600  | 0.40171700  | -1.22906700 |
| H | 6.16224000  | 2.90628000  | -1.28851400 |
| H | 4.59407000  | 2.81403900  | -0.47149800 |
| H | 6.05962700  | 2.32780600  | 0.38127800  |

**[CBC – H]<sup>+</sup> Bare Ion**

|   |             |             |             |
|---|-------------|-------------|-------------|
| O | 2.09657200  | -0.53537400 | -1.54912800 |
| O | 1.35677900  | -3.02510600 | 2.48830800  |
| C | 3.27290400  | 0.14059300  | -1.02734300 |
| C | 2.85141500  | 1.57177400  | -0.60414000 |
| C | 3.90481200  | -0.64419700 | 0.10140300  |
| C | 1.26705000  | -1.21927400 | -0.67311000 |
| C | 4.21925200  | 0.22719000  | -2.22949900 |
| C | 1.87488400  | 1.63724100  | 0.58333900  |
| C | 1.78202300  | -1.75705500 | 0.51303200  |
| C | -0.92607100 | -2.06939300 | -0.18056800 |
| C | 3.16960000  | -1.51845000 | 0.81453400  |
| C | -2.40133200 | -2.12840300 | -0.51895600 |

|   |             |             |             |
|---|-------------|-------------|-------------|
| C | -0.06177800 | -1.35950400 | -1.04619600 |
| C | -3.12719200 | -0.80793000 | -0.20486000 |
| C | 0.92864600  | -2.51658700 | 1.41491500  |
| C | -0.45203300 | -2.62734000 | 0.99167300  |
| C | -4.62289400 | -0.83408900 | -0.52950800 |
| C | 1.37492900  | 3.02988100  | 0.83204200  |
| C | -5.33620700 | 0.48605700  | -0.21862200 |
| C | 0.11158500  | 3.46984500  | 0.75262100  |
| C | -6.83252100 | 0.45770800  | -0.54586200 |
| C | -0.23331100 | 4.91409400  | 1.02927800  |
| C | -1.07477500 | 2.60716700  | 0.39740700  |
| H | 3.75721200  | 2.14772600  | -0.36895100 |
| H | 2.38510300  | 2.04369300  | -1.47773700 |
| H | 4.95233300  | -0.45354200 | 0.31471500  |
| H | 3.74100800  | 0.76653100  | -3.05237600 |
| H | 5.14083800  | 0.74865900  | -1.95341700 |
| H | 4.47179200  | -0.77909300 | -2.56928400 |
| H | 2.38495600  | 1.25827900  | 1.47591300  |
| H | 1.04638800  | 0.95651500  | 0.40235800  |
| H | 3.58710000  | -2.06631000 | 1.65350300  |
| H | -2.53328800 | -2.35811000 | -1.58511600 |
| H | -2.87823600 | -2.94071700 | 0.04170200  |
| H | -0.41300300 | -0.91741300 | -1.97175500 |
| H | -2.64543900 | 0.00348400  | -0.76214200 |
| H | -2.98272100 | -0.57420000 | 0.85659200  |
| H | -1.12068200 | -3.16961700 | 1.65492400  |
| H | -4.76145700 | -1.07739800 | -1.59216300 |
| H | -5.10482100 | -1.64593400 | 0.03252400  |
| H | 2.14299800  | 3.76057200  | 1.09336300  |
| H | -4.85242200 | 1.29565300  | -0.77877700 |
| H | -5.19665000 | 0.72760000  | 0.84217500  |
| H | -7.34413700 | -0.32399800 | 0.02586100  |
| H | -7.31699200 | 1.41176200  | -0.31441800 |
| H | -6.99779300 | 0.24832400  | -1.60825000 |
| H | -0.94830800 | 4.99494500  | 1.85840700  |
| H | 0.65070600  | 5.50443100  | 1.28416300  |
| H | -0.71441100 | 5.37715400  | 0.15774800  |
| H | -0.80962900 | 1.57695400  | 0.16334300  |
| H | -1.79718100 | 2.58733700  | 1.22304800  |
| H | -1.60398900 | 3.02458100  | -0.46887600 |

**[THCA – H] Bare Ion**

|   |             |             |             |
|---|-------------|-------------|-------------|
| O | 1.19558100  | -2.19954300 | -0.57129900 |
| O | 0.59803700  | 2.30299800  | 0.90289900  |
| O | -1.56221700 | 3.41709700  | 0.66005000  |
| O | -3.30689800 | 2.42286100  | -0.28337000 |
| C | 3.22740000  | -1.02246300 | -0.06925200 |
| C | 2.47205100  | 0.21135200  | 0.45543100  |
| C | 2.42959600  | -2.31311500 | 0.17718700  |
| C | 4.66787600  | -0.98002900 | 0.44939400  |
| C | 1.00919300  | 0.14412000  | 0.06292300  |
| C | 5.39398500  | 0.23450500  | -0.15428900 |
| C | 3.21400800  | 1.45488500  | -0.00006900 |
| C | 4.52436500  | 1.46946500  | -0.26547900 |
| C | 0.46929000  | -1.03041000 | -0.43629300 |
| C | 3.11200300  | -3.53815100 | -0.43090600 |
| C | 2.09889700  | -2.56165900 | 1.65477500  |
| C | 0.13244600  | 1.25573600  | 0.30111800  |
| C | -0.86923800 | -1.11693400 | -0.83971400 |
| C | -1.72334800 | -0.02824900 | -0.71228500 |
| C | 5.23664600  | 2.71760000  | -0.71997800 |
| C | -1.24795100 | 1.17396600  | -0.13046500 |

|   |             |             |             |
|---|-------------|-------------|-------------|
| C | -3.15838800 | -0.23567500 | -1.15817100 |
| C | -4.11406800 | -0.51882800 | 0.01299700  |
| C | -2.13134800 | 2.36578200  | 0.06388300  |
| C | -5.57232800 | -0.64275700 | -0.43365800 |
| C | -6.53971700 | -0.93789600 | 0.71688800  |
| C | -8.00007700 | -1.04543200 | 0.26584600  |
| H | 3.26716700  | -0.92884000 | -1.16352500 |
| H | 2.52110600  | 0.21184200  | 1.55712900  |
| H | 5.21637200  | -1.89354400 | 0.20062800  |
| H | 4.65677300  | -0.89978800 | 1.54254300  |
| H | 5.76493800  | -0.02133900 | -1.15889100 |
| H | 6.29132300  | 0.46894900  | 0.43494900  |
| H | 2.62568200  | 2.36134400  | -0.06543000 |
| H | 3.40041200  | -3.34019100 | -1.46651000 |
| H | 4.00159600  | -3.81823000 | 0.13779400  |
| H | 2.41568500  | -4.38020200 | -0.42332400 |
| H | 3.01443500  | -2.61723900 | 2.25076000  |
| H | 1.47108800  | -1.76416800 | 2.05385900  |
| H | 1.55640500  | -3.50497900 | 1.75728500  |
| H | -1.22412500 | -2.05956000 | -1.24033600 |
| H | 5.71623600  | 2.56470600  | -1.69638800 |
| H | 6.03507000  | 2.99738100  | -0.01965700 |
| H | 4.54907000  | 3.56160300  | -0.80721000 |
| H | -3.51785600 | 0.64420000  | -1.69141300 |
| H | -3.18493100 | -1.08771500 | -1.84905200 |
| H | -4.02870500 | 0.29661700  | 0.73471300  |
| H | -3.79952100 | -1.44109500 | 0.51943700  |
| H | -0.58506800 | 3.14178900  | 0.86873900  |
| H | -5.86920000 | 0.29291500  | -0.92382600 |
| H | -5.66269400 | -1.43345700 | -1.19279800 |
| H | -6.44597600 | -0.14755800 | 1.47111300  |
| H | -6.23937400 | -1.87014200 | 1.21243900  |
| H | -8.33267400 | -0.11364900 | -0.20356000 |
| H | -8.12574700 | -1.84705100 | -0.47046100 |
| H | -8.67127600 | -1.25478800 | 1.10543700  |

**[CBDA – H]<sup>-</sup> Bare Ion**

|   |             |             |             |
|---|-------------|-------------|-------------|
| O | -1.07284100 | -1.61220700 | -0.96564300 |
| O | -0.42483300 | 1.35279400  | 2.66512400  |
| O | 2.68290900  | -3.18883900 | -0.76476200 |
| O | 0.68463100  | -3.11859000 | -1.72701700 |
| C | -2.38769100 | 1.14152000  | -0.70450900 |
| C | -2.19936000 | 0.40783400  | 0.65408500  |
| C | -3.87126500 | 1.52656000  | -0.85966800 |
| C | -4.75093600 | 0.27271200  | -0.91762900 |
| C | -3.25271700 | -0.66850900 | 0.82576700  |
| C | -0.79032300 | -0.12509000 | 0.83087000  |
| C | -4.39957700 | -0.74001800 | 0.14750100  |
| C | -1.45403100 | 2.32328200  | -0.86933200 |
| C | -0.29070900 | -1.14026200 | -0.05231800 |
| C | 0.05310700  | 0.36905600  | 1.80616200  |
| C | -5.38054700 | -1.86678700 | 0.33308700  |
| C | 1.89964700  | -1.04408900 | 1.09481700  |
| C | 1.07625700  | -1.60653200 | 0.09265400  |
| C | -1.56978500 | 3.46037300  | 0.11673400  |
| C | 1.37383500  | -0.07621500 | 1.94634600  |
| C | 3.37282600  | -1.36968300 | 1.26595400  |
| C | -0.54248500 | 2.34023700  | -1.84550500 |
| C | 4.26533900  | -0.71742900 | 0.18960800  |
| C | 4.17912300  | 0.81078300  | 0.14673800  |
| C | 1.56283800  | -2.69190900 | -0.81818400 |
| C | 5.05674500  | 1.43499300  | -0.94226300 |

|   |             |             |             |
|---|-------------|-------------|-------------|
| C | 4.94993800  | 2.96259600  | -0.99499700 |
| H | -2.14783900 | 0.41070100  | -1.47997400 |
| H | -2.36687800 | 1.13701800  | 1.45399900  |
| H | -4.18406300 | 2.14556300  | -0.00956400 |
| H | -4.01038900 | 2.12917700  | -1.76429600 |
| H | -5.81071600 | 0.55113300  | -0.82888600 |
| H | -4.64985400 | -0.20742200 | -1.90239500 |
| H | -3.01957000 | -1.43605300 | 1.56003200  |
| H | -5.51301700 | -2.42275200 | -0.60455300 |
| H | -5.04476000 | -2.57301600 | 1.09640000  |
| H | -6.37242000 | -1.49287100 | 0.62115000  |
| H | -0.89006100 | 4.27700100  | -0.14007200 |
| H | -2.58872300 | 3.86216800  | 0.14840900  |
| H | -1.32507400 | 3.11583100  | 1.12603100  |
| H | 2.00568000  | 0.36669400  | 2.71258100  |
| H | 3.52900700  | -2.44687700 | 1.23047700  |
| H | 3.69035500  | -1.00888100 | 2.25294900  |
| H | -0.42868900 | 1.50139000  | -2.52368400 |
| H | 0.13976200  | 3.17603800  | -1.97326100 |
| H | 5.30633500  | -1.01786200 | 0.37208300  |
| H | 3.98897300  | -1.13496700 | -0.78117500 |
| H | 3.13748300  | 1.10893400  | -0.01490700 |
| H | 4.46484800  | 1.22697000  | 1.12407500  |
| H | -0.18614200 | -2.57097600 | -1.57306700 |
| H | 0.28735900  | 1.58608800  | 3.26789700  |
| H | 6.10344800  | 1.14462500  | -0.78136500 |
| H | 4.77035300  | 1.01443400  | -1.91373900 |
| H | 5.57983600  | 3.38821200  | -1.78324100 |
| H | 5.25677100  | 3.41057400  | -0.04326000 |
| H | 3.91769900  | 3.27332800  | -1.18577300 |

**[THC – H] ... IPA**

|   |             |             |             |
|---|-------------|-------------|-------------|
| O | 0.85926600  | -2.41161800 | 0.10367300  |
| O | 0.22505500  | 2.11022800  | -1.40005000 |
| C | 2.78361400  | -0.99962600 | 0.36481000  |
| C | 2.02263600  | 0.24858800  | -0.10955100 |
| C | 1.83772700  | -1.98067200 | 1.07759500  |
| C | 4.03667800  | -0.55459100 | 1.12514100  |
| C | 0.71813300  | -0.13868600 | -0.77801700 |
| C | 4.99037300  | 0.17315400  | 0.16136500  |
| C | 2.95149000  | 1.09000300  | -0.96238200 |
| C | 4.28250100  | 1.06474700  | -0.83826100 |
| C | 0.21547600  | -1.42987800 | -0.64062500 |
| C | 2.54523900  | -3.27546300 | 1.47809500  |
| C | 1.11593400  | -1.36953800 | 2.28633500  |
| C | -0.08806800 | 0.85919700  | -1.44134500 |
| C | -0.99231900 | -1.83316100 | -1.22411900 |
| C | -1.73063900 | -0.90609500 | -1.96366700 |
| C | 5.18669400  | 1.91252400  | -1.69609700 |
| C | -1.27486300 | 0.40283200  | -2.08475200 |
| C | -3.08513300 | -1.29078200 | -2.52675600 |
| C | -4.25411600 | -0.57094100 | -1.82217100 |
| C | -4.29448400 | -0.80738000 | -0.31030600 |
| C | -5.44352000 | -0.07626000 | 0.38927400  |
| C | -5.42470500 | -0.25735300 | 1.91024800  |
| H | 3.11441700  | -1.53870000 | -0.53443600 |
| H | 1.77341000  | 0.86422500  | 0.76898500  |
| H | 4.55765200  | -1.40154600 | 1.58284100  |
| H | 3.74486700  | 0.12157100  | 1.93664300  |
| H | 5.58877300  | -0.56710100 | -0.39288600 |

|   |             |             |             |
|---|-------------|-------------|-------------|
| H | 5.71904200  | 0.76722400  | 0.73074100  |
| H | 2.47056800  | 1.76019400  | -1.66518100 |
| H | 3.10518200  | -3.68180100 | 0.63155600  |
| H | 3.23224200  | -3.10925200 | 2.31110900  |
| H | 1.80046000  | -4.01457900 | 1.78390100  |
| H | 1.83718300  | -1.02143200 | 3.03136100  |
| H | 0.49652800  | -0.52370000 | 1.98885500  |
| H | 0.46992800  | -2.12133600 | 2.74756500  |
| H | -1.34307400 | -2.84569600 | -1.06095400 |
| H | 5.89879500  | 1.29061600  | -2.25632900 |
| H | 5.78622800  | 2.60025800  | -1.08422300 |
| H | 4.61546100  | 2.50608000  | -2.41345500 |
| H | -3.12545500 | -1.05710500 | -3.59799900 |
| H | -3.22442500 | -2.37476100 | -2.43517400 |
| H | -5.20399800 | -0.89272700 | -2.27239600 |
| H | -4.16861200 | 0.50606200  | -2.00654100 |
| H | -4.36923000 | -1.88490400 | -0.10836900 |
| H | -3.34107800 | -0.48546400 | 0.12045900  |
| H | -6.40363100 | -0.42634700 | -0.01321500 |
| H | -5.38420400 | 0.99251900  | 0.15023200  |
| H | -4.49084700 | 0.12519300  | 2.33329200  |
| H | -6.25289400 | 0.27138100  | 2.39338200  |
| H | -5.49832500 | -1.31632500 | 2.18063600  |
| H | -1.86273900 | 1.15039200  | -2.60949600 |
| C | -1.47587000 | 1.89284100  | 2.96848700  |
| H | -2.39304400 | 1.34754200  | 3.21427000  |
| H | -1.55474800 | 2.91008400  | 3.36660200  |
| H | -0.63281100 | 1.39909600  | 3.45943100  |
| C | -1.25357000 | 1.93987300  | 1.46038000  |
| H | -1.16953000 | 0.90839800  | 1.08505600  |
| C | -2.41546200 | 2.60954400  | 0.72195000  |
| H | -2.19863000 | 2.63149400  | -0.34802200 |
| H | -3.35076700 | 2.06198700  | 0.88020400  |
| H | -2.54148300 | 3.63794400  | 1.07822200  |
| O | -0.03256400 | 2.63006400  | 1.23254500  |
| H | 0.16224800  | 2.56385100  | 0.26019100  |

**[CBD - H] ... IPA**

|   |             |             |             |
|---|-------------|-------------|-------------|
| O | 1.28628600  | -2.41861000 | -1.47343300 |
| O | 0.48990900  | 1.70481000  | 0.76934800  |
| C | 2.87318600  | -1.36751800 | 0.99977900  |
| C | 2.40287700  | -0.25789600 | 0.02051300  |
| C | 4.39721200  | -1.24067200 | 1.20253600  |
| C | 5.14170400  | -1.48116800 | -0.11580900 |
| C | 3.30702100  | -0.19772800 | -1.19162100 |
| C | 0.93409200  | -0.35225300 | -0.34487400 |
| C | 4.52777800  | -0.73290100 | -1.27732400 |
| C | 2.12230800  | -1.36373400 | 2.31765600  |
| C | 0.40924400  | -1.41253300 | -1.07479200 |
| C | 0.05057200  | 0.70278900  | 0.08559000  |
| C | 5.35850100  | -0.66639300 | -2.53179200 |
| C | 2.07021300  | -0.07296700 | 3.09384700  |
| C | -1.81555200 | -0.48055700 | -1.01248800 |
| C | -0.94430600 | -1.50123200 | -1.41742600 |
| C | -1.32582200 | 0.59209100  | -0.28334400 |
| C | -3.29549900 | -0.58783000 | -1.31190100 |
| C | 1.52935600  | -2.47603000 | 2.76299700  |
| C | -4.08018500 | -1.28726300 | -0.18798300 |



|   |             |             |             |
|---|-------------|-------------|-------------|
| C | -5.58024700 | -1.40098400 | -0.47303000 |
| C | -6.36575200 | -2.09365600 | 0.64536000  |
| C | -7.86564000 | -2.20178200 | 0.35270500  |
| H | 2.68797900  | -2.32970900 | 0.51345800  |
| H | 2.49186800  | 0.70900700  | 0.52990600  |
| H | 4.73503900  | -1.95144000 | 1.96482100  |
| H | 4.63295800  | -0.23542000 | 1.57072400  |
| H | 5.15141400  | -2.55728700 | -0.34901500 |
| H | 6.19735900  | -1.19283300 | -0.00979300 |
| H | 2.89658500  | 0.33020800  | -2.04982400 |
| H | 6.31731400  | -0.16162500 | -2.35137600 |
| H | 4.83852500  | -0.13451800 | -3.33270600 |
| H | 5.59979200  | -1.67467000 | -2.89596800 |
| H | 1.60119100  | -0.21846400 | 4.07054100  |
| H | 3.07512000  | 0.33477800  | 3.25419500  |
| H | 1.50207200  | 0.68232300  | 2.53849100  |
| H | -1.31001800 | -2.35224400 | -1.98863700 |
| H | -1.98926400 | 1.38996400  | 0.03569500  |
| H | -3.71330000 | 0.41442900  | -1.46395400 |
| H | -3.44939200 | -1.13858400 | -2.24907300 |
| H | 0.99702600  | -2.49722900 | 3.70953100  |
| H | 1.52977200  | -3.39013900 | 2.17734800  |
| H | -3.92069500 | -0.73572200 | 0.74539500  |
| H | -3.65673500 | -2.28622600 | -0.02797200 |
| H | -5.99568500 | -0.39728900 | -0.63650200 |
| H | -5.73310800 | -1.94891500 | -1.41343100 |
| H | 0.78278100  | -3.06128900 | -1.98134000 |
| H | -6.21311300 | -1.54557200 | 1.58291900  |
| H | -5.95031300 | -3.09576100 | 0.80900000  |
| H | -8.31063600 | -1.21043200 | 0.21637000  |
| H | -8.04645200 | -2.77174700 | -0.56508800 |
| H | -8.40289100 | -2.69962500 | 1.16620800  |
| C | -0.71712900 | 4.16264300  | -1.30270600 |
| H | -1.80165600 | 4.10617800  | -1.44609200 |
| H | -0.31010400 | 3.15380800  | -1.39096200 |
| H | -0.28908200 | 4.78901700  | -2.09509600 |
| C | -0.40383200 | 4.73276200  | 0.08607300  |
| H | 0.69367700  | 4.80224600  | 0.18220600  |
| C | -0.99403500 | 6.12871800  | 0.27384100  |
| H | -2.08509600 | 6.08230900  | 0.18976100  |
| H | -0.74676800 | 6.51287600  | 1.26733800  |
| H | -0.61400900 | 6.82637600  | -0.48050600 |
| O | -0.92158700 | 3.90880800  | 1.11126900  |
| H | -0.44540100 | 3.02971500  | 1.05112000  |

**[CBC - H] ... IPA**

|   |           |           |           |
|---|-----------|-----------|-----------|
| O | 1.903227  | -0.780290 | -2.261968 |
| O | 1.092651  | -2.788847 | 2.027352  |
| C | 3.132367  | -0.127903 | -1.831672 |
| C | 2.810091  | 1.369862  | -1.594339 |
| C | 3.731897  | -0.793680 | -0.621800 |
| C | 1.067188  | -1.347539 | -1.316799 |
| C | 4.068063  | -0.263022 | -3.038946 |
| C | 1.932531  | 1.636314  | -0.360926 |
| C | 1.560565  | -1.785983 | -0.092730 |
| C | -1.153456 | -2.079747 | -0.744264 |
| C | 2.954628  | -1.569616 | 0.201562  |
| C | -2.638821 | -2.099006 | -1.048567 |

|   |           |           |           |
|---|-----------|-----------|-----------|
| C | -0.279958 | -1.475736 | -1.676453 |
| C | -3.334978 | -0.813042 | -0.567005 |
| C | 0.685202  | -2.411984 | 0.873312  |
| C | -0.687674 | -2.544039 | 0.464650  |
| C | -4.840602 | -0.788761 | -0.837217 |
| C | 1.363275  | 3.030745  | -0.320087 |
| C | -5.529319 | 0.480012  | -0.323930 |
| C | 0.096101  | 3.383420  | -0.295883 |
| C | -7.032587 | 0.513804  | -0.614100 |
| C | -0.324837 | 4.839317  | -0.234184 |
| C | -1.074119 | 2.419229  | -0.309565 |
| H | 3.751449  | 1.928954  | -1.508577 |
| H | 2.298636  | 1.731336  | -2.494365 |
| H | 4.770869  | -0.617508 | -0.409025 |
| H | 3.622721  | 0.208849  | -3.919742 |
| H | 5.030989  | 0.212673  | -2.831901 |
| H | 4.236060  | -1.319088 | -3.255889 |
| H | 2.527712  | 1.454232  | 0.538272  |
| H | 1.125470  | 0.908285  | -0.337536 |
| H | 3.360670  | -2.015484 | 1.089287  |
| H | -2.806531 | -2.214828 | -2.126316 |
| H | -3.105833 | -2.961593 | -0.556536 |
| H | -0.618686 | -1.102970 | -2.628268 |
| H | -2.861145 | 0.049190  | -1.049170 |
| H | -3.149454 | -0.696384 | 0.506664  |
| H | -1.366581 | -2.999818 | 1.185025  |
| H | -5.018847 | -0.884652 | -1.917063 |
| H | -5.309287 | -1.667313 | -0.373709 |
| H | 2.118362  | 3.830101  | -0.304694 |
| H | -5.047729 | 1.357951  | -0.770876 |
| H | -5.364322 | 0.563170  | 0.756637  |
| H | -7.222005 | 0.470405  | -1.691697 |
| H | -7.539349 | -0.343909 | -0.159427 |
| H | -7.502031 | 1.424998  | -0.229365 |
| H | -0.963415 | 5.102779  | -1.084833 |
| H | -0.909505 | 5.042624  | 0.670359  |
| H | 0.539496  | 5.508213  | -0.238128 |
| H | -1.744917 | 2.644051  | -1.146079 |
| H | -0.771432 | 1.376229  | -0.394365 |
| H | -1.670678 | 2.521732  | 0.603239  |
| C | -0.634342 | 0.148527  | 3.132942  |
| H | -1.167443 | 0.911255  | 2.554287  |
| H | -0.895660 | 0.255353  | 4.190839  |
| H | -0.960738 | -0.833820 | 2.787561  |
| C | 0.880470  | 0.280520  | 2.956380  |
| H | 1.105252  | 0.152553  | 1.892430  |
| C | 1.395249  | 1.644281  | 3.399976  |
| H | 1.184797  | 1.797430  | 4.464199  |
| H | 2.477327  | 1.699851  | 3.254055  |
| H | 0.924955  | 2.445355  | 2.822626  |
| O | 1.575468  | -0.712947 | 3.698278  |
| H | 1.468457  | -1.559360 | 3.200650  |

[THCA - H] ... IPA

|   |             |             |             |
|---|-------------|-------------|-------------|
| O | -0.27372200 | 2.93361500  | 0.01782700  |
| O | -0.45678000 | -1.82022300 | -0.32821100 |
| O | 1.56159300  | -3.11507300 | -0.88487100 |
| O | 3.50802400  | -2.13263600 | -1.27738900 |

|   |             |             |             |
|---|-------------|-------------|-------------|
| C | -2.48844000 | 2.02116400  | -0.15160800 |
| C | -1.97195400 | 0.57262100  | -0.11746400 |
| C | -1.57609500 | 2.95488400  | 0.65899200  |
| C | -3.97848300 | 2.01282600  | 0.20337600  |
| C | -0.47101900 | 0.53406100  | -0.32004000 |
| C | -4.76496700 | 1.25829800  | -0.88458600 |
| C | -2.77431700 | -0.23719800 | -1.11864700 |
| C | -4.03299900 | 0.06105600  | -1.45403500 |
| C | 0.27434700  | 1.70300100  | -0.27625300 |
| C | -2.00656600 | 4.41703300  | 0.55336700  |
| C | -1.42042100 | 2.54344300  | 2.12816500  |
| C | 0.21887000  | -0.70756100 | -0.46622200 |
| C | 1.65123900  | 1.70404600  | -0.52672100 |
| C | 2.33105000  | 0.52146100  | -0.78930700 |
| C | -4.82055700 | -0.77190500 | -2.43129000 |
| C | 1.63134700  | -0.71317100 | -0.75146200 |
| C | 3.82369300  | 0.63696000  | -1.03278000 |
| C | 4.66142600  | 0.28931100  | 0.20941000  |
| C | 2.32259300  | -2.01998800 | -0.99257800 |
| C | 6.16604500  | 0.32875800  | -0.06601300 |
| C | 7.01917100  | -0.00031700 | 1.16302200  |
| C | 8.52427200  | 0.02625100  | 0.87777300  |
| H | -2.39418900 | 2.37358900  | -1.18815700 |
| H | -2.18669700 | 0.14817700  | 0.87504100  |
| H | -4.37788300 | 3.02650000  | 0.30323400  |
| H | -4.11468300 | 1.51703400  | 1.17087600  |
| H | -4.99820800 | 1.94451900  | -1.71306300 |
| H | -5.73925400 | 0.93794800  | -0.49073500 |
| H | -2.29085000 | -1.11347700 | -1.53136400 |
| H | -2.16670900 | 4.69421800  | -0.49178800 |
| H | -2.92672900 | 4.59756400  | 1.11341100  |
| H | -1.22054800 | 5.05655800  | 0.96208500  |
| H | -2.39223200 | 2.53814200  | 2.62957000  |
| H | -0.98251700 | 1.54874200  | 2.21711700  |
| H | -0.76588800 | 3.25253800  | 2.64127900  |
| H | 2.17619900  | 2.65201400  | -0.49938700 |
| H | -5.17420100 | -0.16489700 | -3.27536800 |
| H | -5.71340400 | -1.19840500 | -1.95507200 |
| H | -4.22303100 | -1.59502300 | -2.82897900 |
| H | 4.12507000  | -0.01980000 | -1.84836400 |
| H | 4.04450400  | 1.66989100  | -1.32890700 |
| H | 4.38494500  | -0.71205700 | 0.54688600  |
| H | 4.41206500  | 0.98827300  | 1.01864400  |
| H | 0.62259800  | -2.79877100 | -0.63373100 |
| H | 6.39508800  | -0.38579800 | -0.86653800 |
| H | 6.44820400  | 1.32150400  | -0.44586400 |
| H | 6.73429200  | -0.99025900 | 1.53856600  |
| H | 6.78553100  | 0.70985800  | 1.96657800  |
| H | 8.78678600  | -0.69885300 | 0.10030800  |
| H | 8.84000100  | 1.01447300  | 0.52538000  |
| H | 9.11164200  | -0.21347200 | 1.77024000  |
| C | -3.10287100 | -3.79803100 | 0.41484700  |
| H | -4.07817800 | -4.08821100 | 0.00763700  |
| H | -2.65618000 | -4.66376300 | 0.91451100  |
| H | -2.45025700 | -3.50621400 | -0.41086100 |
| C | -3.24497700 | -2.63692900 | 1.40232200  |
| H | -3.72336700 | -1.79889000 | 0.87133600  |
| C | -4.10771300 | -3.00207500 | 2.60570200  |

|   |             |             |            |
|---|-------------|-------------|------------|
| H | -3.65757600 | -3.83980400 | 3.14782700 |
| H | -4.17793700 | -2.15287900 | 3.29093500 |
| H | -5.11787500 | -3.28670800 | 2.29335200 |
| O | -1.98055000 | -2.22604600 | 1.90280400 |
| H | -1.38309100 | -2.06933900 | 1.13427800 |

**[CBDA – H] ... IPA**

|   |             |             |             |
|---|-------------|-------------|-------------|
| O | -0.80419500 | -0.41082600 | -1.53325800 |
| O | -1.19839500 | -0.31129200 | 3.18489200  |
| O | 1.32474800  | -0.39889800 | -2.63422600 |
| O | 3.24507100  | -0.11866500 | -1.55417300 |
| C | -3.04320600 | 1.04059400  | -0.03245600 |
| C | -2.55785300 | -0.25428800 | 0.68966400  |
| C | -4.56232100 | 0.94310500  | -0.25823000 |
| C | -4.90344500 | -0.23030200 | -1.18555500 |
| C | -3.13987200 | -1.49196200 | 0.03198900  |
| C | -1.04563900 | -0.33770300 | 0.80882400  |
| C | -4.18799000 | -1.50627800 | -0.80109800 |
| C | -2.61102700 | 2.29709700  | 0.71151500  |
| C | -0.22696500 | -0.38501300 | -0.36642700 |
| C | -0.41519200 | -0.33939800 | 2.04441800  |
| C | -4.68050600 | -2.76763000 | -1.46283800 |
| C | 1.80883300  | -0.40021700 | 1.04335400  |
| C | 1.21996300  | -0.37464300 | -0.24719400 |
| C | -1.37264700 | 2.97547900  | 0.18034600  |
| C | 0.98310900  | -0.37895300 | 2.16581100  |
| C | 3.29608500  | -0.55240300 | 1.31677000  |
| C | -3.26767700 | 2.77064600  | 1.78051800  |
| C | 3.73466500  | -2.02035800 | 1.55163900  |
| C | 3.44471500  | -2.98662900 | 0.38349300  |
| C | 2.01494300  | -0.29854900 | -1.51030000 |
| C | 2.07632800  | -3.68373900 | 0.46202500  |
| C | 1.76190900  | -4.50091100 | -0.79585900 |
| H | -2.55909800 | 1.04201100  | -1.01481000 |
| H | -2.95261400 | -0.20732100 | 1.71224500  |
| H | -5.07091000 | 0.79828200  | 0.70473800  |
| H | -4.93932900 | 1.88441200  | -0.67687300 |
| H | -5.99092600 | -0.40207800 | -1.19101300 |
| H | -4.63517600 | 0.02316600  | -2.22417300 |
| H | -2.63037700 | -2.42688600 | 0.26346900  |
| H | -4.61223800 | -2.68351900 | -2.55733500 |
| H | -4.09617200 | -3.64150800 | -1.15706600 |
| H | -5.73763700 | -2.95945300 | -1.22676100 |
| H | -0.52205100 | 2.28585900  | 0.19466700  |
| H | -1.51318300 | 3.26745700  | -0.86848300 |
| H | -1.10882000 | 3.86652800  | 0.75954800  |
| H | 1.43081000  | -0.41391800 | 3.15847900  |
| H | 3.53805300  | 0.02129300  | 2.22124200  |
| H | 3.87954500  | -0.13841100 | 0.49901200  |
| H | -2.92501700 | 3.65819200  | 2.30731900  |
| H | -4.14991400 | 2.27878100  | 2.18086500  |
| H | 4.81494100  | -2.00263900 | 1.75186300  |
| H | 3.25624900  | -2.40301900 | 2.46578500  |
| H | 3.52390600  | -2.43507600 | -0.56035300 |
| H | 4.22196600  | -3.76485200 | 0.35207400  |
| H | 0.28768100  | -0.43941900 | -2.34077100 |
| H | -0.61494700 | -0.26265200 | 3.95202600  |
| H | 2.05883000  | -4.33737900 | 1.34747900  |
| H | 1.28872000  | -2.93941300 | 0.61153300  |
| H | 0.79934700  | -5.01894000 | -0.70980000 |
| H | 2.53664200  | -5.25645100 | -0.98460300 |
| H | 1.71139300  | -3.84741400 | -1.67427600 |

|   |            |            |             |
|---|------------|------------|-------------|
| C | 2.74702400 | 4.31188700 | 0.23449200  |
| H | 3.33590500 | 5.04365100 | -0.33211600 |
| H | 3.26118000 | 4.11731600 | 1.18141700  |
| H | 1.76262700 | 4.74335300 | 0.44922800  |
| C | 2.60809700 | 3.02074600 | -0.56643200 |
| H | 2.02836900 | 2.29884500 | 0.02877200  |
| C | 1.88583700 | 3.24370100 | -1.89962200 |
| H | 1.80801200 | 2.30744000 | -2.45999900 |
| H | 0.87168400 | 3.62676600 | -1.73514100 |
| H | 2.44409700 | 3.96640700 | -2.50737500 |
| O | 3.92736800 | 2.51261300 | -0.77259600 |
| H | 3.83865900 | 1.60144900 | -1.11900200 |

**[THC - H] ... MeOH**

|   |             |             |             |
|---|-------------|-------------|-------------|
| O | -0.68478900 | 2.27996500  | -0.37291300 |
| O | -0.02682200 | -2.47916900 | -0.59261000 |
| C | -2.63020100 | 0.98090500  | 0.16585200  |
| C | -1.85966300 | -0.34597200 | 0.07686100  |
| C | -1.70951100 | 2.11977600  | 0.63486100  |
| C | -3.92188500 | 0.75005400  | 0.95630800  |
| C | -0.52002200 | -0.14634800 | -0.60468800 |
| C | -4.83643800 | -0.21014000 | 0.17532400  |
| C | -2.75588800 | -1.38500300 | -0.56775700 |
| C | -4.09097900 | -1.33153400 | -0.51885500 |
| C | -0.01048400 | 1.13852100  | -0.79255200 |
| C | -2.42375700 | 3.47159600  | 0.64359100  |
| C | -1.04861500 | 1.85482100  | 1.99445700  |
| C | 0.30452000  | -1.28095700 | -0.93796500 |
| C | 1.22525300  | 1.37635700  | -1.40211800 |
| C | 1.99329500  | 0.28483600  | -1.82514900 |
| C | -4.96202100 | -2.37764800 | -1.16617500 |
| C | 1.53152600  | -1.00810000 | -1.61410800 |
| C | 3.38440400  | 0.52292800  | -2.37700700 |
| C | 4.39884100  | 0.91053500  | -1.27858800 |
| C | 4.56427700  | -0.15910800 | -0.19551100 |
| C | 5.50151800  | 0.25769400  | 0.94122700  |
| C | 5.62949900  | -0.81661900 | 2.02639100  |
| H | -2.91349300 | 1.25983300  | -0.85910400 |
| H | -1.66014500 | -0.70758400 | 1.09819500  |
| H | -4.45552000 | 1.68649400  | 1.14769000  |
| H | -3.67509700 | 0.31420200  | 1.93101100  |
| H | -5.40195500 | 0.35514800  | -0.58230200 |
| H | -5.59603200 | -0.63525700 | 0.84648300  |
| H | -2.24898300 | -2.21545600 | -1.04499500 |
| H | -2.94199900 | 3.63526900  | -0.30507600 |
| H | -3.14874900 | 3.53067000  | 1.45872400  |
| H | -1.68739700 | 4.26855600  | 0.77475100  |
| H | -1.80626200 | 1.71226200  | 2.77044400  |
| H | -0.42133200 | 0.96387800  | 1.96011400  |
| H | -0.42052500 | 2.70653100  | 2.26948100  |
| H | 1.57295800  | 2.39819700  | -1.50587600 |
| H | -5.63872100 | -1.92745400 | -1.90594800 |
| H | -5.59867100 | -2.88013200 | -0.42516400 |
| H | -4.36317400 | -3.13877300 | -1.67144200 |
| H | 3.73689000  | -0.38153600 | -2.88654000 |
| H | 3.35966300  | 1.32210200  | -3.12828200 |
| H | 4.06537400  | 1.84398500  | -0.80919300 |
| H | 5.37442700  | 1.12079700  | -1.73998100 |
| H | 3.58025600  | -0.40297500 | 0.21629400  |

|   |             |             |             |
|---|-------------|-------------|-------------|
| H | 4.93498300  | -1.08650400 | -0.65342200 |
| H | 5.12599400  | 1.18597300  | 1.39022500  |
| H | 6.49491100  | 0.49428300  | 0.53621200  |
| H | 6.03187100  | -1.74673900 | 1.61100400  |
| H | 6.29130700  | -0.49818600 | 2.83870900  |
| H | 4.65164200  | -1.04995100 | 2.45865000  |
| H | 2.14285900  | -1.86539100 | -1.88030000 |
| C | 1.33194600  | -1.70626100 | 2.21230200  |
| H | 2.17940800  | -2.32208600 | 1.87302900  |
| H | 1.48373800  | -1.47230000 | 3.27236400  |
| H | 1.36262400  | -0.76638700 | 1.64232900  |
| O | 0.09438100  | -2.37315700 | 2.07990000  |
| H | -0.04670700 | -2.52458300 | 1.10669400  |

**[CBD-H]<sup>+</sup> ... MeOH**

|   |             |             |             |
|---|-------------|-------------|-------------|
| O | 0.60023600  | -2.10274000 | -1.33951000 |
| O | 0.27534300  | 2.23908000  | 0.62431400  |
| C | 2.26638800  | -1.12606800 | 1.09504600  |
| C | 1.96478800  | -0.02769500 | 0.03980300  |
| C | 3.79334800  | -1.20979000 | 1.30304300  |
| C | 4.49554300  | -1.64453100 | 0.01172000  |
| C | 2.87446900  | -0.17665400 | -1.16157200 |
| C | 0.50284400  | 0.06433500  | -0.35596700 |
| C | 4.00245900  | -0.88923700 | -1.20069600 |
| C | 1.53279500  | -0.91980300 | 2.40680100  |
| C | -0.14000100 | -0.95969600 | -1.04503500 |
| C | -0.24039600 | 1.25901300  | -0.02792100 |
| C | 4.83510200  | -1.02165400 | -2.44820800 |
| C | 1.64245400  | 0.42959900  | 3.06860300  |
| C | -2.21049300 | 0.27268800  | -1.15348000 |
| C | -1.47634300 | -0.88494300 | -1.44991400 |
| C | -1.60438200 | 1.30896000  | -0.46245000 |
| C | -3.67305800 | 0.35249200  | -1.53599100 |
| C | 0.81958000  | -1.91307600 | 2.94788100  |
| C | -4.60944700 | -0.20102900 | -0.44694800 |
| C | -6.08994600 | -0.13790500 | -0.83867200 |
| C | -7.05148800 | -0.73407900 | 0.20121600  |
| C | -7.10925800 | 0.05426600  | 1.51595500  |
| H | 1.94057500  | -2.08189000 | 0.67535900  |
| H | 2.20006400  | 0.93984400  | 0.49457200  |
| H | 4.02212200  | -1.91021500 | 2.11366100  |
| H | 4.17330700  | -0.22757600 | 1.60595000  |
| H | 4.34305700  | -2.72254200 | -0.15311600 |
| H | 5.58205500  | -1.51117300 | 0.11149400  |
| H | 2.54745100  | 0.34959000  | -2.05543700 |
| H | 5.85782000  | -0.65458400 | -2.28791800 |
| H | 4.40058500  | -0.46663000 | -3.28362800 |
| H | 4.92391500  | -2.07429800 | -2.75069400 |
| H | 1.21424300  | 0.41223100  | 4.07438100  |
| H | 2.68513300  | 0.75678500  | 3.14273100  |
| H | 1.11841000  | 1.18670500  | 2.47449700  |
| H | -1.93349500 | -1.71354900 | -1.98726500 |
| H | -2.15693100 | 2.21330700  | -0.22442800 |
| H | -3.94474300 | 1.39571800  | -1.73696100 |
| H | -3.84598400 | -0.20119100 | -2.46834200 |
| H | 0.30413300  | -1.79200800 | 3.89631800  |
| H | 0.70439900  | -2.86756400 | 2.44310400  |
| H | -4.43088300 | 0.36084900  | 0.47548500  |

|   |             |             |             |
|---|-------------|-------------|-------------|
| H | -4.32993600 | -1.24018300 | -0.23130100 |
| H | -6.37136800 | 0.90723900  | -1.02588400 |
| H | -6.22598700 | -0.66309000 | -1.79319200 |
| H | 0.03822000  | -2.69096000 | -1.85177700 |
| H | -6.75553100 | -1.76997900 | 0.40907300  |
| H | -8.05974300 | -0.78368600 | -0.22875600 |
| H | -7.39605700 | 1.09487600  | 1.33135600  |
| H | -7.84017600 | -0.37731300 | 2.20690000  |
| H | -6.14086100 | 0.06507900  | 2.02143100  |
| C | 2.97036600  | 3.51501400  | -0.74952300 |
| H | 3.44328200  | 2.54542300  | -0.96992200 |
| H | 3.70785900  | 4.30364600  | -0.94550100 |
| H | 2.13646100  | 3.64615100  | -1.45468500 |
| O | 2.55026500  | 3.61566900  | 0.59264300  |
| H | 1.70990000  | 3.09367900  | 0.67076100  |

**[CBC - H] ... MeOH**

|   |             |             |             |
|---|-------------|-------------|-------------|
| O | -1.98318600 | -0.67283000 | -1.80645600 |
| O | -1.66805600 | 2.90565500  | 1.36039400  |
| C | -3.13618400 | -1.27010700 | -1.14990000 |
| C | -2.63688300 | -2.47752800 | -0.31543100 |
| C | -3.88417300 | -0.24994100 | -0.32006000 |
| C | -1.25654200 | 0.29833000  | -1.14071800 |
| C | -4.00443600 | -1.77697000 | -2.30597800 |
| C | -1.75894200 | -2.11578300 | 0.89645200  |
| C | -1.87345000 | 1.10651700  | -0.17697200 |
| C | 0.83926200  | 1.43570700  | -0.83943700 |
| C | -3.25926200 | 0.85042600  | 0.13440000  |
| C | 2.32038000  | 1.52837100  | -1.14102400 |
| C | 0.07690300  | 0.44398400  | -1.49314800 |
| C | 3.12074600  | 0.37110400  | -0.51862900 |
| C | -1.12534000 | 2.14683300  | 0.48643900  |
| C | 0.25864500  | 2.25810500  | 0.11140400  |
| C | 4.61390600  | 0.40148900  | -0.85414900 |
| C | -1.13346500 | -3.32430500 | 1.53003000  |
| C | 5.39242600  | -0.77746100 | -0.26042200 |
| C | 0.17135800  | -3.62271600 | 1.59849900  |
| C | 6.87660600  | -0.78010100 | -0.63896400 |
| C | 0.65209500  | -4.88456100 | 2.27529000  |
| C | 1.27580000  | -2.76136100 | 1.03589700  |
| H | -3.50836500 | -3.05563400 | 0.02083400  |
| H | -2.06499700 | -3.12105800 | -0.99454900 |
| H | -4.92544700 | -0.46006800 | -0.09553400 |
| H | -3.44273600 | -2.48714200 | -2.91962500 |
| H | -4.90005300 | -2.27421200 | -1.92130200 |
| H | -4.30904900 | -0.93646100 | -2.93260400 |
| H | -2.37670500 | -1.58800200 | 1.63117100  |
| H | -0.99505200 | -1.40636400 | 0.58738100  |
| H | -3.76367000 | 1.57806300  | 0.76128900  |
| H | 2.48017000  | 1.52079500  | -2.22764900 |
| H | 2.71647300  | 2.47996100  | -0.76985200 |
| H | 0.50973700  | -0.21050100 | -2.24126000 |
| H | 2.69249600  | -0.57812000 | -0.85908400 |
| H | 2.98206300  | 0.39262300  | 0.56865300  |
| H | 0.84895900  | 3.01547300  | 0.61796000  |
| H | 4.73981300  | 0.40209200  | -1.94564100 |
| H | 5.05319000  | 1.34286500  | -0.49732700 |
| H | -1.83394100 | -4.03695500 | 1.96980700  |

|   |             |             |             |
|---|-------------|-------------|-------------|
| H | 4.92829300  | -1.71419500 | -0.59329100 |
| H | 5.29072800  | -0.76095600 | 0.83143500  |
| H | 7.37146300  | 0.13464900  | -0.29549400 |
| H | 7.40769000  | -1.63078300 | -0.19981700 |
| H | 7.00352900  | -0.83428800 | -1.72558900 |
| H | 1.34525000  | -4.65036900 | 3.09377500  |
| H | -0.17420100 | -5.46964500 | 2.68741700  |
| H | 1.20556800  | -5.52064000 | 1.57214500  |
| H | 1.92775700  | -2.39629900 | 1.83943500  |
| H | 1.91273800  | -3.34867500 | 0.36235200  |
| H | 0.91501400  | -1.89477300 | 0.48367800  |
| C | -0.42593900 | 5.82816800  | 0.84634100  |
| H | -0.42249500 | 6.91585300  | 0.99555600  |
| H | -1.26015900 | 5.57458100  | 0.17743600  |
| H | 0.50684100  | 5.55773100  | 0.32284700  |
| O | -0.54334000 | 5.19253300  | 2.09791700  |
| H | -0.92531100 | 4.28839000  | 1.92108000  |

**[THCA - H] ... MeOH**

|   |             |             |             |
|---|-------------|-------------|-------------|
| O | -1.74891700 | -2.20435500 | 0.79465700  |
| O | -0.79816700 | 1.59313100  | -1.91956700 |
| O | 1.42302800  | 2.55796000  | -1.96746600 |
| O | 3.06541600  | 1.83787500  | -0.66851600 |
| C | -3.71553800 | -1.10989600 | -0.11917300 |
| C | -2.85221800 | -0.07910700 | -0.88967000 |
| C | -2.94839000 | -2.44338100 | 0.02467100  |
| C | -4.14927200 | -0.52999500 | 1.23721700  |
| C | -1.38622800 | -0.17144000 | -0.47618200 |
| C | -5.00208100 | 0.72603900  | 1.05467900  |
| C | -3.41819400 | 1.32244600  | -0.76344300 |
| C | -4.39156900 | 1.69295700  | 0.07172000  |
| C | -0.93313800 | -1.18247800 | 0.35310000  |
| C | -3.71533100 | -3.49510100 | 0.82799200  |
| C | -2.56837000 | -3.03354000 | -1.34407200 |
| C | -0.42379700 | 0.74593600  | -1.01422000 |
| C | 0.39552100  | -1.24561600 | 0.79594500  |
| C | 1.33198000  | -0.31022300 | 0.37989000  |
| C | -4.93643800 | 3.09739700  | 0.09768500  |
| C | 0.94494000  | 0.69840600  | -0.54249800 |
| C | 2.74598100  | -0.48854600 | 0.89944500  |
| C | 3.69777600  | -1.11213800 | -0.13509000 |
| C | 1.89485200  | 1.72427800  | -1.05092800 |
| C | 5.13634200  | -1.20671700 | 0.37805400  |
| C | 6.10421100  | -1.82730000 | -0.63410600 |
| C | 7.54500200  | -1.90801600 | -0.11923300 |
| H | -4.61995100 | -1.30818500 | -0.70971300 |
| H | -2.90198200 | -0.31389500 | -1.96281600 |
| H | -3.25278100 | -0.28443600 | 1.81427700  |
| H | -4.71212000 | -1.26671200 | 1.81532900  |
| H | -5.14049600 | 1.22510800  | 2.02318200  |
| H | -6.01451200 | 0.45188000  | 0.71800100  |
| H | -2.96226900 | 2.04718000  | -1.42611900 |
| H | -3.84736800 | -3.18021800 | 1.86286600  |
| H | -4.69815000 | -3.67384200 | 0.38216400  |
| H | -3.15731500 | -4.43453300 | 0.83317500  |
| H | -3.46943900 | -3.22937900 | -1.93320900 |
| H | -1.92335700 | -2.36084300 | -1.90869200 |
| H | -2.03150900 | -3.97441600 | -1.20040100 |



|   |             |             |             |
|---|-------------|-------------|-------------|
| H | 0.67434800  | -2.05660600 | 1.45859500  |
| H | -4.77818400 | 3.56261500  | 1.07926400  |
| H | -6.02027300 | 3.10348700  | -0.08121400 |
| H | -4.46207800 | 3.72761400  | -0.65784100 |
| H | 3.16178000  | 0.46355000  | 1.22516600  |
| H | 2.70547400  | -1.14374900 | 1.77794200  |
| H | 3.68043400  | -0.50198800 | -1.04070300 |
| H | 3.33092700  | -2.11109200 | -0.40598600 |
| H | 0.41902600  | 2.29072900  | -2.11403200 |
| H | 5.48303000  | -0.19961900 | 0.64054600  |
| H | 5.16080200  | -1.79315500 | 1.30784600  |
| H | 6.07764500  | -1.23819400 | -1.55860100 |
| H | 5.75344400  | -2.83235300 | -0.90218200 |
| H | 8.21775400  | -2.35173300 | -0.86063800 |
| H | 7.92753400  | -0.91184700 | 0.12603300  |
| H | 7.60329200  | -2.51507200 | 0.79095000  |
| C | 2.28239400  | 3.15431900  | 2.16748600  |
| H | 2.28177900  | 3.54177800  | 3.19066400  |
| H | 1.74765500  | 2.19513600  | 2.15835200  |
| H | 1.72461100  | 3.85529300  | 1.53081500  |
| O | 3.63363900  | 3.02099800  | 1.75851900  |
| H | 3.61165000  | 2.66291800  | 0.85036100  |

**[CBDA - H]<sup>-</sup> ... MeOH**

|   |             |             |             |
|---|-------------|-------------|-------------|
| O | 1.04501100  | 1.00639900  | -0.98907500 |
| O | 0.10322000  | -1.92711100 | 2.59966600  |
| O | -2.40698200 | 3.11475400  | -0.60589600 |
| O | -0.43484400 | 2.80741000  | -1.58663900 |
| C | 2.15945300  | -1.82619000 | -0.71422700 |
| C | 1.99473900  | -1.08942700 | 0.64479700  |
| C | 3.62740300  | -2.26801000 | -0.86760000 |
| C | 4.55367600  | -1.04801200 | -0.91961300 |
| C | 3.10457600  | -0.07524000 | 0.84450100  |
| C | 0.62558100  | -0.45515700 | 0.80289500  |
| C | 4.25109100  | -0.03924000 | 0.16374200  |
| C | 1.18099600  | -2.97040800 | -0.88548800 |
| C | 0.23044500  | 0.61768200  | -0.05828300 |
| C | -0.26777600 | -0.87969700 | 1.76761100  |
| C | 5.27821500  | 1.04175000  | 0.36837900  |
| C | -1.93649400 | 0.76718700  | 1.12106400  |
| C | -1.05541000 | 1.25656800  | 0.12878600  |
| C | 1.24348700  | -4.11086000 | 0.10159000  |
| C | -1.53052200 | -0.29271400 | 1.92543200  |
| C | -3.34732600 | 1.28606500  | 1.32900500  |
| C | 0.28002500  | -2.95386800 | -1.87151300 |
| C | -4.32996800 | 0.83215200  | 0.23015500  |
| C | -4.47822500 | -0.68742800 | 0.11451600  |
| C | -1.38167800 | 2.45470000  | -0.70298000 |
| C | -5.44391900 | -1.11715400 | -0.99393100 |
| C | -5.57792400 | -2.63854600 | -1.11569500 |
| H | 1.95261700  | -1.08606200 | -1.48997400 |
| H | 2.09879500  | -1.83010600 | 1.44458000  |
| H | 3.91539200  | -2.90149600 | -0.01946000 |
| H | 3.74383800  | -2.87180600 | -1.77446600 |
| H | 5.60264900  | -1.36723700 | -0.84465800 |
| H | 4.46094000  | -0.55091300 | -1.89645900 |
| H | 2.90897000  | 0.68490200  | 1.59741600  |
| H | 5.42574300  | 1.61300300  | -0.55730900 |
| H | 4.97552500  | 1.74438600  | 1.14840400  |
| H | 6.25552600  | 0.62153500  | 0.64084700  |

|   |             |             |             |
|---|-------------|-------------|-------------|
| H | 2.24809800  | -4.54537300 | 0.14961800  |
| H | 0.99315600  | -3.75919400 | 1.10704900  |
| H | 0.54198100  | -4.90489900 | -0.16691100 |
| H | -2.20734900 | -0.68378900 | 2.68117400  |
| H | -3.34641600 | 2.37494200  | 1.35784600  |
| H | -3.70800400 | 0.91894500  | 2.29832500  |
| H | -0.43094700 | -3.76398700 | -2.00739600 |
| H | 0.20774800  | -2.11355200 | -2.55365900 |
| H | -5.31212600 | 1.27851600  | 0.43660800  |
| H | -3.99624000 | 1.24941000  | -0.72267000 |
| H | -3.49491100 | -1.13372000 | -0.07069600 |
| H | -4.82241700 | -1.10051300 | 1.07406300  |
| H | 0.32993400  | 2.07280400  | -1.50138100 |
| H | -0.61996800 | -2.08816400 | 3.21299600  |
| H | -6.43180700 | -0.67438800 | -0.81081400 |
| H | -5.09710600 | -0.70254400 | -1.94810900 |
| H | -5.95008400 | -3.07570100 | -0.18248200 |
| H | -4.60780400 | -3.09863600 | -1.32931700 |
| H | -6.26797200 | -2.92348000 | -1.91669800 |
| C | 1.89184300  | 3.94823600  | 0.41185100  |
| H | 2.22873400  | 2.99336200  | -0.00692000 |
| H | 1.15077300  | 3.73075500  | 1.19434800  |
| H | 2.74239900  | 4.45631300  | 0.87569000  |
| O | 1.37094700  | 4.82106300  | -0.58439200 |
| H | 0.65781000  | 4.34223700  | -1.03888100 |

**[THC - H] ... MeCN**

|   |             |             |             |
|---|-------------|-------------|-------------|
| O | -0.55530500 | 2.24382800  | 0.00414200  |
| O | -0.39089000 | -2.48475000 | -0.89975700 |
| C | -2.70153300 | 1.17098700  | -0.08922700 |
| C | -2.07760500 | -0.22759500 | -0.22626200 |
| C | -1.79574400 | 2.10211600  | 0.73339000  |
| C | -4.15455700 | 1.02089600  | 0.37243700  |
| C | -0.60372800 | -0.13227300 | -0.57104200 |
| C | -4.96982400 | 0.30690300  | -0.71997500 |
| C | -2.91388700 | -1.03750100 | -1.19905300 |
| C | -4.21256300 | -0.80511900 | -1.41573500 |
| C | 0.06612300  | 1.08498800  | -0.44900600 |
| C | -2.34590000 | 3.52734600  | 0.79744600  |
| C | -1.49665300 | 1.58267300  | 2.14562200  |
| C | 0.14168000  | -1.31919800 | -0.93746700 |
| C | 1.41898700  | 1.23646500  | -0.77359100 |
| C | 2.13562600  | 0.11976000  | -1.21973000 |
| C | -5.02306500 | -1.62405100 | -2.38775000 |
| C | 1.51219500  | -1.11911400 | -1.30105200 |
| C | 3.61429800  | 0.25062100  | -1.52159200 |
| C | 4.49894600  | 0.02906200  | -0.28205100 |
| C | 5.99732500  | 0.15820900  | -0.57016200 |
| C | 6.88092900  | -0.06418400 | 0.66168300  |
| C | 8.37798400  | 0.06725400  | 0.36385300  |
| H | -2.71444100 | 1.61530400  | -1.09448600 |
| H | -2.17140000 | -0.73473200 | 0.74807100  |
| H | -4.61269200 | 1.98991800  | 0.59366500  |
| H | -4.18088400 | 0.43362600  | 1.29701500  |
| H | -5.28925400 | 1.03855500  | -1.47889100 |
| H | -5.90006200 | -0.09368100 | -0.29345900 |
| H | -2.40253900 | -1.85767200 | -1.68887800 |
| H | -2.62030800 | 3.87646300  | -0.20161900 |
| H | -3.22271700 | 3.58330800  | 1.44667000  |
| H | -1.57606200 | 4.19347300  | 1.19503400  |

|   |             |             |             |
|---|-------------|-------------|-------------|
| H | -2.41908700 | 1.40259700  | 2.70340900  |
| H | -0.93619600 | 0.64919200  | 2.10613500  |
| H | -0.89427000 | 2.31618500  | 2.68822400  |
| H | 1.88264600  | 2.21029900  | -0.66194800 |
| H | -5.46610700 | -0.98885700 | -3.16742300 |
| H | -5.85850700 | -2.12833800 | -1.88332500 |
| H | -4.41074900 | -2.38553700 | -2.87605700 |
| H | 3.89917200  | -0.47484500 | -2.29340300 |
| H | 3.82418000  | 1.24669200  | -1.93221100 |
| H | 4.28509500  | -0.96498900 | 0.12813400  |
| H | 4.20801100  | 0.74858600  | 0.49262100  |
| H | 6.28075000  | -0.56073300 | -1.35120000 |
| H | 6.20370000  | 1.15403100  | -0.98637900 |
| H | 6.67508800  | -1.05871600 | 1.07613800  |
| H | 6.59737600  | 0.65358000  | 1.44132000  |
| H | 8.69289300  | -0.66114700 | -0.39104100 |
| H | 8.61474300  | 1.06410200  | -0.02337400 |
| H | 8.98603600  | -0.09609300 | 1.25936300  |
| H | 2.06709600  | -1.99984100 | -1.61374200 |
| C | -1.30532500 | -2.25176800 | 3.06534700  |
| N | -2.17837200 | -2.12570900 | 3.81142900  |
| C | -0.20747300 | -2.41341600 | 2.12783300  |
| H | 0.33828000  | -1.47352800 | 2.01633000  |
| H | 0.48039300  | -3.18225100 | 2.48752200  |
| H | -0.55944100 | -2.68597900 | 1.11920500  |

**[CBD – H]<sup>+</sup> ... MeCN**

|   |             |             |             |
|---|-------------|-------------|-------------|
| O | -1.46546500 | -1.79595400 | -1.57866700 |
| O | -0.27615200 | 0.18412900  | 2.59297700  |
| C | -2.31728800 | 1.04142000  | -0.60283700 |
| C | -2.23912800 | -0.02743400 | 0.52274500  |
| C | -3.72923900 | 1.66292800  | -0.61128300 |
| C | -4.78671200 | 0.60438400  | -0.94194200 |
| C | -3.46002100 | -0.92144000 | 0.49903500  |
| C | -0.94296200 | -0.81499000 | 0.52714400  |
| C | -4.60201000 | -0.66673800 | -0.14507100 |
| C | -1.23688500 | 2.10096100  | -0.50386900 |
| C | -0.58697300 | -1.67292400 | -0.50385800 |
| C | -0.04111500 | -0.64774200 | 1.65325400  |
| C | -5.76056800 | -1.62885300 | -0.15773800 |
| C | -1.13263300 | 2.87866800  | 0.78309300  |
| C | 1.48873000  | -2.27327400 | 0.57212400  |
| C | 0.61328600  | -2.39748800 | -0.51428300 |
| C | 1.15551600  | -1.44127700 | 1.63015900  |
| C | 2.83380000  | -2.97393000 | 0.54727000  |
| C | -0.40995700 | 2.33036200  | -1.52986200 |
| C | 4.01698700  | -1.99349100 | 0.40986500  |
| C | 3.94957600  | -1.12581600 | -0.84982200 |
| C | 5.07138000  | -0.08703300 | -0.93891800 |
| C | 4.94068300  | 0.82786300  | -2.16031200 |
| H | -2.18583900 | 0.51898800  | -1.55471900 |
| H | -2.24112300 | 0.48973700  | 1.49011300  |
| H | -3.77330000 | 2.48435300  | -1.33513100 |
| H | -3.94563900 | 2.08920300  | 0.37512300  |
| H | -4.75273600 | 0.36320300  | -2.01572700 |
| H | -5.79288400 | 1.00895600  | -0.76137400 |
| H | -3.36202200 | -1.84878900 | 1.05962800  |
| H | -6.66803200 | -1.16953300 | 0.25733500  |

|   |             |             |             |
|---|-------------|-------------|-------------|
| H | -5.54155200 | -2.53209900 | 0.41759000  |
| H | -6.00612600 | -1.93310400 | -1.18468100 |
| H | -0.37002000 | 3.65808700  | 0.71585900  |
| H | -2.08676000 | 3.35537600  | 1.03493100  |
| H | -0.88028300 | 2.20333300  | 1.60884300  |
| H | 0.86405100  | -3.02949900 | -1.36319800 |
| H | 1.82672300  | -1.32921400 | 2.47733500  |
| H | 2.96763600  | -3.55685200 | 1.46666500  |
| H | 2.86195200  | -3.68814700 | -0.28497400 |
| H | 0.35658200  | 3.09836100  | -1.48296300 |
| H | -0.46400300 | 1.74060200  | -2.43975800 |
| H | 4.03355800  | -1.34136500 | 1.29114300  |
| H | 4.96186100  | -2.55455800 | 0.42160000  |
| H | 3.97700900  | -1.77028200 | -1.73942200 |
| H | 2.97964900  | -0.61954800 | -0.87849200 |
| H | -1.08825300 | -2.43261200 | -2.19267500 |
| H | 6.04418900  | -0.59618000 | -0.95779800 |
| H | 5.06870500  | 0.52600500  | -0.02924800 |
| H | 3.99773300  | 1.38188000  | -2.13011800 |
| H | 5.75333300  | 1.55912000  | -2.20723600 |
| H | 4.95459800  | 0.24714200  | -3.08920900 |
| C | 2.61634200  | 2.98575700  | 0.82057400  |
| N | 3.01608100  | 4.05633300  | 0.65198200  |
| C | 2.12197400  | 1.63385100  | 1.01993300  |
| H | 2.95409300  | 0.93909400  | 1.13585500  |
| H | 1.47714000  | 1.55677700  | 1.90108500  |
| H | 1.52344000  | 1.31926200  | 0.16284800  |

**[CBC - H] ... MeCN**

|   |             |             |             |
|---|-------------|-------------|-------------|
| O | -2.01665400 | -0.79989900 | -1.45987700 |
| O | -2.79632200 | 2.29582900  | 2.04046300  |
| C | -2.42223600 | -1.89749700 | -0.62255900 |
| C | -1.16905200 | -2.39453900 | 0.14464200  |
| C | -3.46396500 | -1.49286700 | 0.37028800  |
| C | -1.83165500 | 0.40160500  | -0.84358500 |
| C | -2.93577100 | -2.92056900 | -1.64308900 |
| C | 0.08141900  | -2.54859500 | -0.72709500 |
| C | -2.50850000 | 0.71043900  | 0.33889100  |
| C | -0.73496800 | 2.52426200  | -0.87773700 |
| C | -3.45137600 | -0.22985000 | 0.84847500  |
| C | 0.24540500  | 3.46398400  | -1.53408000 |
| C | -0.95736900 | 1.26922100  | -1.48806900 |
| C | 1.64369300  | 3.28223800  | -0.91617300 |
| C | -2.27816300 | 1.99307200  | 0.96457700  |
| C | -1.34793500 | 2.88305400  | 0.28969800  |
| C | 2.28044100  | 1.96088100  | -1.36405100 |
| C | 1.29242800  | -2.77182200 | 0.11808300  |
| C | 3.61818800  | 1.70367900  | -0.65799200 |
| C | 2.54040700  | -2.47696500 | -0.27231900 |
| C | 3.41168200  | 1.13865900  | 0.74435700  |
| C | 3.70745600  | -2.68016300 | 0.63845600  |
| C | 2.85931200  | -1.92059900 | -1.62040700 |
| H | -0.96128500 | -1.66316100 | 0.95216600  |
| H | -1.41225700 | -3.34325400 | 0.64679500  |
| H | -4.16756300 | -2.24237100 | 0.68141100  |
| H | -3.21426800 | -3.85514600 | -1.15998400 |
| H | -3.81797400 | -2.52427000 | -2.15896700 |
| H | -2.17648000 | -3.12477300 | -2.40799200 |

|   |             |             |             |
|---|-------------|-------------|-------------|
| H | 0.22035700  | -1.63812700 | -1.35412500 |
| H | -0.04734400 | -3.37929300 | -1.44470600 |
| H | -4.13998100 | 0.11698400  | 1.61862000  |
| H | 0.28224700  | 3.30051800  | -2.62634200 |
| H | -0.09261300 | 4.51002600  | -1.40311500 |
| H | -0.47738400 | 0.99774800  | -2.40768300 |
| H | 1.56110300  | 3.30824500  | 0.18820100  |
| H | 2.28981600  | 4.13170600  | -1.19590200 |
| H | -1.18439000 | 3.84020600  | 0.75767400  |
| H | 1.57339500  | 1.12402300  | -1.16370900 |
| H | 2.42225100  | 1.96265100  | -2.45848400 |
| H | 1.09823500  | -3.17730700 | 1.10950500  |
| H | 4.20939600  | 2.63522700  | -0.61127300 |
| H | 4.22083300  | 0.99578000  | -1.25608200 |
| H | 2.76073800  | 1.78744000  | 1.34757200  |
| H | 2.93295600  | 0.15121800  | 0.70993100  |
| H | 4.35408900  | 1.02493700  | 1.28371200  |
| H | 3.39684000  | -2.79042300 | 1.68711400  |
| H | 4.27834700  | -3.57225200 | 0.36480400  |
| H | 4.39018400  | -1.82043700 | 0.61072700  |
| H | 3.92639700  | -1.99060100 | -1.86362600 |
| H | 2.30869900  | -2.43287800 | -2.41857300 |
| H | 2.58429400  | -0.85249400 | -1.66821100 |
| C | 1.08684700  | -0.31641400 | 2.84044500  |
| N | 1.85133900  | -0.99799400 | 3.39082500  |
| C | 0.14702800  | 0.52099200  | 2.16746900  |
| H | 0.24150800  | 0.48420800  | 1.05741300  |
| H | -0.91667200 | 0.25033400  | 2.37286600  |
| H | 0.22109300  | 1.59083300  | 2.44043800  |

**[THCA - H] ... MeCN**

|   |             |             |             |
|---|-------------|-------------|-------------|
| O | 0.55926500  | -2.18130800 | 0.75893800  |
| O | 1.14178400  | 2.23168100  | -0.94064700 |
| O | -0.79084400 | 3.58954400  | -1.56356500 |
| O | -2.85958600 | 2.78926900  | -1.51121300 |
| C | 2.82542900  | -1.60624400 | 0.20455000  |
| C | 2.45196500  | -0.15164900 | -0.13048600 |
| C | 1.90704900  | -2.18204100 | 1.29466400  |
| C | 4.33516600  | -1.68592400 | 0.44891900  |
| C | 0.94890000  | -0.00934700 | -0.26177700 |
| C | 5.08351700  | -1.35520300 | -0.85395900 |
| C | 3.25690400  | 0.28499000  | -1.34094100 |
| C | 4.44074900  | -0.24694000 | -1.66162800 |
| C | 0.10543600  | -1.01910000 | 0.16941300  |
| C | 2.18840700  | -3.65943500 | 1.56512100  |
| C | 1.92421100  | -1.38327200 | 2.60395500  |
| C | 0.36316900  | 1.21766800  | -0.71180000 |
| C | -1.28872500 | -0.92927900 | 0.04642100  |
| C | -1.88858800 | 0.20766600  | -0.47909400 |
| C | 5.22093900  | 0.20309100  | -2.87003500 |
| C | -1.07208500 | 1.31153000  | -0.85417300 |
| C | -3.40356200 | 0.25314500  | -0.60909100 |
| C | -4.17230000 | -1.00093700 | -0.18185700 |
| C | -1.66246400 | 2.59815900  | -1.33619000 |
| C | -5.68354200 | -0.83620800 | -0.38630100 |
| C | -6.52641800 | -2.01827000 | 0.11600700  |
| C | -6.27875200 | -3.33056700 | -0.63821600 |
| H | 2.60264000  | -2.20561800 | -0.68929700 |

|   |             |             |             |
|---|-------------|-------------|-------------|
| H | 2.77446900  | 0.49467300  | 0.70261200  |
| H | 4.63729600  | -2.67652700 | 0.80145000  |
| H | 4.61389500  | -0.96868700 | 1.22939600  |
| H | 5.13998200  | -2.25600400 | -1.48438100 |
| H | 6.12641000  | -1.09011700 | -0.63288500 |
| H | 2.83768700  | 1.09355000  | -1.92618300 |
| H | 2.23195500  | -4.21854300 | 0.62674500  |
| H | 3.13166200  | -3.78967300 | 2.09996800  |
| H | 1.38334000  | -4.07495400 | 2.17584800  |
| H | 2.93603200  | -1.34049300 | 3.01635200  |
| H | 1.57115200  | -0.36329900 | 2.44767200  |
| H | 1.26828400  | -1.86035400 | 3.33633300  |
| H | -1.86526900 | -1.77499500 | 0.39217000  |
| H | 5.40810100  | -0.63636100 | -3.55325700 |
| H | 6.20426700  | 0.59844800  | -2.58293600 |
| H | 4.68983400  | 0.98051900  | -3.42349400 |
| H | -3.77842500 | 1.11526500  | -0.04973000 |
| H | -3.65352400 | 0.49315200  | -1.64663600 |
| H | -3.98211700 | -1.22263200 | 0.87633200  |
| H | -3.81510700 | -1.86700700 | -0.74937500 |
| H | 0.14821800  | 3.20485200  | -1.36526600 |
| H | -6.01161800 | 0.07625100  | 0.12647500  |
| H | -5.88932200 | -0.67283100 | -1.45275200 |
| H | -7.58897900 | -1.75731600 | 0.03619500  |
| H | -6.32875100 | -2.17116000 | 1.18497500  |
| H | -5.25133600 | -3.68041800 | -0.51032600 |
| H | -6.94546100 | -4.12434800 | -0.28590400 |
| H | -6.45119400 | -3.20023500 | -1.71226600 |
| C | 0.10026800  | 3.64909900  | 3.18440900  |
| N | 0.33238300  | 3.97887500  | 4.26632100  |
| C | -0.18842900 | 3.23140600  | 1.82130800  |
| H | 0.72829200  | 3.10681100  | 1.23918300  |
| H | -0.71870000 | 2.27708800  | 1.81432800  |
| H | -0.80881200 | 3.97133200  | 1.31098800  |

**[CBDA – H]<sup>+</sup> ... MeCN**

|   |             |             |             |
|---|-------------|-------------|-------------|
| O | -1.16205100 | -1.19766800 | -1.32964800 |
| O | -0.90817000 | 0.06409700  | 3.22483500  |
| O | 2.43616900  | -3.10888200 | -1.32323800 |
| O | 0.58438600  | -2.51765100 | -2.39254300 |
| C | -2.51407000 | 1.28245200  | -0.16192900 |
| C | -2.45247800 | 0.09324500  | 0.83586900  |
| C | -3.97780700 | 1.75513600  | -0.27717200 |
| C | -4.86155000 | 0.64879400  | -0.86362200 |
| C | -3.52571600 | -0.92867300 | 0.51184700  |
| C | -1.07706600 | -0.54408500 | 0.92730200  |
| C | -4.60867500 | -0.70040400 | -0.23313100 |
| C | -1.58040900 | 2.42493400  | 0.18846100  |
| C | -0.50288100 | -1.19148600 | -0.21697700 |
| C | -0.35111100 | -0.53496900 | 2.10349300  |
| C | -5.61108600 | -1.77611800 | -0.55554500 |
| C | 1.52467900  | -1.71672200 | 1.10342700  |
| C | 0.80527300  | -1.81069100 | -0.11136500 |
| C | -1.64951700 | 2.99890100  | 1.58269600  |
| C | 0.93080600  | -1.09366400 | 2.19584600  |
| C | 2.96396300  | -2.16775600 | 1.27723800  |
| C | -0.74273100 | 2.92274000  | -0.72524300 |
| C | 3.97243200  | -1.23121600 | 0.57780100  |
| C | 3.92333900  | 0.22353000  | 1.05350900  |

|   |             |             |             |
|---|-------------|-------------|-------------|
| C | 1.35424000  | -2.53314200 | -1.30244600 |
| C | 4.83704800  | 1.15410400  | 0.25003900  |
| C | 4.73948700  | 2.61781400  | 0.69018500  |
| H | -2.21409200 | 0.88642800  | -1.13450200 |
| H | -2.68626900 | 0.48401800  | 1.83176900  |
| H | -4.35519500 | 2.03191600  | 0.71514700  |
| H | -4.02978600 | 2.65255900  | -0.90267300 |
| H | -5.92226600 | 0.91539500  | -0.75391100 |
| H | -4.68539500 | 0.56678400  | -1.94649200 |
| H | -3.36308600 | -1.92154300 | 0.92448400  |
| H | -5.67476400 | -1.93317900 | -1.64031500 |
| H | -5.34335400 | -2.72975100 | -0.09357200 |
| H | -6.61893900 | -1.49968300 | -0.21708400 |
| H | -1.01226900 | 3.88173200  | 1.67736900  |
| H | -2.67449400 | 3.28869200  | 1.84131900  |
| H | -1.33225800 | 2.26071500  | 2.32389300  |
| H | 1.47995300  | -1.00888600 | 3.13027600  |
| H | 3.09889400  | -3.17234700 | 0.87898900  |
| H | 3.18816600  | -2.19107900 | 2.35112200  |
| H | -0.68547500 | 2.50437000  | -1.72396500 |
| H | -0.08133800 | 3.75617200  | -0.50986300 |
| H | 4.98406800  | -1.62964900 | 0.73104500  |
| H | 3.78908700  | -1.27848100 | -0.49793900 |
| H | 2.89409400  | 0.59320600  | 0.99270800  |
| H | 4.19307500  | 0.27679800  | 2.11837000  |
| H | -0.27066000 | -1.98088500 | -2.13971800 |
| H | -0.28043300 | -0.02074500 | 3.94869900  |
| H | 5.87573800  | 0.80857600  | 0.33360500  |
| H | 4.57786900  | 1.08096200  | -0.81276900 |
| H | 5.40355700  | 3.26050400  | 0.10436300  |
| H | 5.00524700  | 2.72947600  | 1.74753900  |
| H | 3.72035600  | 2.99465100  | 0.56038100  |
| C | 2.17516200  | 2.02425500  | -2.47914200 |
| N | 2.57351500  | 3.03784900  | -2.86196800 |
| C | 1.68548200  | 0.74672000  | -1.98549800 |
| H | 0.71701600  | 0.49544800  | -2.42196800 |
| H | 2.38921500  | -0.05163100 | -2.22779400 |
| H | 1.55557600  | 0.78315700  | -0.90386300 |

**[THC – H] ... Acetic acid**

|   |             |             |             |
|---|-------------|-------------|-------------|
| O | 1.62412200  | -2.45355400 | 0.02007700  |
| O | -0.06794900 | 1.96677500  | -0.80469400 |
| C | 3.22468000  | -0.69203300 | 0.33264300  |
| C | 2.17497700  | 0.40608000  | 0.09546600  |
| C | 2.58806400  | -1.93954500 | 0.96805300  |
| C | 4.43225900  | -0.07837400 | 1.04725500  |
| C | 0.91432000  | -0.17800500 | -0.51054300 |
| C | 5.10783400  | 0.94876900  | 0.12231400  |
| C | 2.81583000  | 1.52928900  | -0.69775600 |
| C | 4.12907900  | 1.77962600  | -0.68142800 |
| C | 0.70623900  | -1.55904800 | -0.51222600 |
| C | 3.59168900  | -3.08198000 | 1.12257400  |
| C | 1.88393300  | -1.66141700 | 2.30313100  |
| C | -0.14190500 | 0.67322100  | -0.96590400 |
| C | -0.45072600 | -2.14134900 | -1.03665300 |
| C | -1.44929800 | -1.32057600 | -1.56881000 |
| C | 4.74191400  | 2.90117900  | -1.48022600 |
| C | -1.28491000 | 0.06101100  | -1.54330100 |
| C | -2.73594100 | -1.93797300 | -2.07666200 |
| C | -3.80561500 | -2.11848000 | -0.97609300 |
| C | -4.42375900 | -0.80748800 | -0.48073300 |

|   |             |             |             |
|---|-------------|-------------|-------------|
| C | -5.41981000 | -0.99698200 | 0.66762100  |
| C | -6.10475300 | 0.30897000  | 1.08479200  |
| H | 3.56232300  | -1.02941700 | -0.65730300 |
| H | 1.89916600  | 0.84119000  | 1.07100600  |
| H | 5.16104600  | -0.84003300 | 1.34053200  |
| H | 4.09661400  | 0.41582200  | 1.96633800  |
| H | 5.77972000  | 0.42754700  | -0.57715500 |
| H | 5.75798600  | 1.61317300  | 0.70810400  |
| H | 2.13716300  | 2.15954000  | -1.25929300 |
| H | 4.13531400  | -3.24189300 | 0.18776700  |
| H | 4.30939000  | -2.87273700 | 1.91906400  |
| H | 3.05631500  | -4.00177700 | 1.37027000  |
| H | 1.05279500  | -0.96768900 | 2.17058800  |
| H | 1.48501700  | -2.59413000 | 2.71011200  |
| H | 2.58312300  | -1.23404000 | 3.02766400  |
| H | -0.55511500 | -3.22006100 | -1.00369700 |
| H | 5.49903900  | 2.51994200  | -2.17898000 |
| H | 5.25307500  | 3.62128000  | -0.82735000 |
| H | 3.98733900  | 3.44057900  | -2.05677900 |
| H | -2.51621700 | -2.91761000 | -2.51657900 |
| H | -3.15408800 | -1.31787000 | -2.87855500 |
| H | -3.35085200 | -2.65116200 | -0.13165000 |
| H | -4.60636300 | -2.76629500 | -1.35943400 |
| H | -3.63272500 | -0.12456000 | -0.15988400 |
| H | -4.92698400 | -0.30818400 | -1.31986100 |
| H | -4.88987600 | -1.42580000 | 1.52806800  |
| H | -6.17673500 | -1.73873700 | 0.37599900  |
| H | -6.68920400 | 0.72113100  | 0.25473700  |
| H | -6.78828100 | 0.15012200  | 1.92603100  |
| H | -5.37536700 | 1.07011400  | 1.37490400  |
| H | -2.06345400 | 0.71549500  | -1.92018300 |
| C | -1.77119200 | 1.59552100  | 1.74524200  |
| H | -1.78719000 | 0.62536400  | 1.24031400  |
| H | -2.13650600 | 1.48323800  | 2.76527500  |
| H | -0.73313000 | 1.93287800  | 1.73199500  |
| C | -2.67004400 | 2.57036900  | 0.99189900  |
| O | -2.23643200 | 2.98436800  | -0.17850900 |
| H | -1.29945800 | 2.55805500  | -0.47330100 |
| O | -3.74362400 | 2.92638800  | 1.45653900  |

**[CBD – H] ... Acetic Acid**

|   |             |             |             |
|---|-------------|-------------|-------------|
| O | -0.15878400 | -2.66802500 | -0.94230100 |
| O | 0.22799100  | 2.08912300  | -0.61912300 |
| C | 1.34416200  | -1.17283700 | 1.33568800  |
| C | 1.43770700  | -0.50048100 | -0.06331000 |
| C | 2.76805600  | -1.33975500 | 1.89170300  |
| C | 3.59947500  | -2.27237100 | 1.00121800  |
| C | 2.45521800  | -1.20722700 | -0.93237200 |
| C | 0.08876300  | -0.31162700 | -0.72710000 |
| C | 3.43258000  | -1.99442200 | -0.47613400 |
| C | 0.40834100  | -0.40658500 | 2.26074700  |
| C | -0.69266600 | -1.39557800 | -1.11845900 |
| C | -0.43299000 | 1.01870700  | -0.91113300 |
| C | 4.40928200  | -2.68665500 | -1.38963800 |
| C | -0.94279200 | -1.03674600 | 2.48633700  |
| C | -2.51983800 | 0.02866700  | -1.78681500 |
| C | -1.98119900 | -1.25650400 | -1.64302400 |
| C | -1.75322900 | 1.13060200  | -1.44226500 |



|   |             |             |             |
|---|-------------|-------------|-------------|
| C | -3.96092600 | 0.21124300  | -2.21798200 |
| C | 0.73263900  | 0.77312400  | 2.79239900  |
| C | -4.88092500 | 0.59214800  | -1.03812900 |
| C | -4.96045200 | -0.49145200 | 0.04323000  |
| C | -5.76817400 | -0.08923800 | 1.28615500  |
| C | -5.08856600 | 0.99126900  | 2.13696800  |
| H | 0.92716900  | -2.17350000 | 1.18327900  |
| H | 1.81626900  | 0.50630900  | 0.11680300  |
| H | 2.73068000  | -1.72597800 | 2.91596300  |
| H | 3.24994100  | -0.35772200 | 1.94221200  |
| H | 3.32245900  | -3.32097200 | 1.19267300  |
| H | 4.66244700  | -2.19590500 | 1.26872000  |
| H | 2.35935700  | -1.04102400 | -2.00329200 |
| H | 5.44159100  | -2.38465700 | -1.16964800 |
| H | 4.20609900  | -2.46633100 | -2.44073600 |
| H | 4.36577000  | -3.77624800 | -1.25619400 |
| H | -1.56445500 | -0.43660300 | 3.15641100  |
| H | -1.46683500 | -1.14523700 | 1.53052700  |
| H | -0.84194800 | -2.04342400 | 2.91198400  |
| H | -2.56298600 | -2.13696000 | -1.90574800 |
| H | -2.14925100 | 2.13601800  | -1.54787400 |
| H | -4.02335200 | 0.99719500  | -2.97941700 |
| H | -4.33213600 | -0.71050100 | -2.68324200 |
| H | 0.02920400  | 1.31862100  | 3.41400700  |
| H | 1.67057200  | 1.27105100  | 2.57668300  |
| H | -5.89199000 | 0.80323500  | -1.41392800 |
| H | -4.50410500 | 1.52320400  | -0.60417100 |
| H | -5.40007400 | -1.39565400 | -0.39873000 |
| H | -3.94512700 | -0.76500600 | 0.34885600  |
| H | -0.81019400 | -3.30585500 | -1.24809000 |
| H | -5.92708000 | -0.97926400 | 1.90735300  |
| H | -6.76669200 | 0.25332500  | 0.98206900  |
| H | -4.97406200 | 1.92846400  | 1.58672900  |
| H | -5.66577700 | 1.20647900  | 3.04192000  |
| H | -4.08768800 | 0.67055500  | 2.44145300  |
| C | 3.19353400  | 2.48482200  | -1.59304500 |
| H | 2.18698700  | 2.65124900  | -1.97908800 |
| H | 3.36565800  | 1.40385200  | -1.59226700 |
| H | 3.94960600  | 2.95937200  | -2.21816200 |
| C | 3.33747300  | 2.98991000  | -0.16414700 |
| O | 2.27731300  | 2.85386700  | 0.61608300  |
| H | 1.44458200  | 2.47804200  | 0.12212400  |
| O | 4.38254400  | 3.46250900  | 0.24727500  |

**[CBC – H]’ ... Acetic Acid**

|   |             |             |             |
|---|-------------|-------------|-------------|
| O | 0.82016400  | -2.14628900 | -1.73856200 |
| O | -2.74490700 | -1.10370500 | 1.27426700  |
| C | 1.19041500  | -3.35979800 | -1.02488200 |
| C | 2.45762700  | -3.05079300 | -0.18962000 |
| C | 0.04538700  | -3.87611900 | -0.18194000 |
| C | -0.03425900 | -1.24132500 | -1.14189400 |
| C | 1.53940300  | -4.35522300 | -2.13539000 |
| C | 2.25540000  | -2.03763100 | 0.95204100  |
| C | -0.95779900 | -1.66535600 | -0.17786700 |
| C | -0.81813500 | 1.02437300  | -0.98035600 |
| C | -0.94388500 | -3.05789100 | 0.21083100  |
| C | -0.64501800 | 2.48704300  | -1.32845400 |
| C | 0.04809100  | 0.07912500  | -1.56063600 |

|   |             |             |             |
|---|-------------|-------------|-------------|
| C | 0.53426400  | 3.12236500  | -0.56937800 |
| C | -1.87115400 | -0.72412500 | 0.40180300  |
| C | -1.75340200 | 0.63249300  | -0.03300600 |
| C | 0.76251500  | 4.59778000  | -0.90565000 |
| C | 3.55778300  | -1.62323800 | 1.57265200  |
| C | 1.94411700  | 5.21342100  | -0.14788400 |
| C | 4.12402900  | -0.40925500 | 1.54137400  |
| C | 2.18558300  | 6.68520700  | -0.49620600 |
| C | 5.46418400  | -0.15365100 | 2.18892700  |
| C | 3.51907200  | 0.80176400  | 0.87383200  |
| H | 2.84752300  | -3.99335000 | 0.21740900  |
| H | 3.21259200  | -2.66216700 | -0.88323900 |
| H | 0.07668500  | -4.92309500 | 0.10327900  |
| H | 2.33792100  | -3.95400600 | -2.76548400 |
| H | 1.87144600  | -5.30485600 | -1.70593400 |
| H | 0.66071900  | -4.53695400 | -2.75653700 |
| H | 1.60378800  | -2.48581000 | 1.70944100  |
| H | 1.72047500  | -1.17174500 | 0.57023200  |
| H | -1.75569600 | -3.40257500 | 0.84174000  |
| H | -0.47348900 | 2.59735400  | -2.40705000 |
| H | -1.56270100 | 3.03765800  | -1.09454000 |
| H | 0.78634400  | 0.36109400  | -2.30265300 |
| H | 1.44471100  | 2.55322700  | -0.78942300 |
| H | 0.35881200  | 3.01030200  | 0.50710800  |
| H | -2.41197300 | 1.36594900  | 0.42140000  |
| H | 0.93198300  | 4.70332300  | -1.98638000 |
| H | -0.14839000 | 5.17007900  | -0.68339500 |
| H | 4.10600600  | -2.41875100 | 2.08025400  |
| H | 2.84958700  | 4.63154300  | -0.36164400 |
| H | 1.76861500  | 5.11495800  | 0.93052000  |
| H | 1.30391200  | 7.29285400  | -0.26534200 |
| H | 3.03198500  | 7.09963000  | 0.06098400  |
| H | 2.39737500  | 6.80582200  | -1.56429000 |
| H | 5.38693100  | 0.62699000  | 2.95689400  |
| H | 5.87100200  | -1.05352000 | 2.65727700  |
| H | 6.19272100  | 0.20670400  | 1.45047400  |
| H | 4.16075700  | 1.14455000  | 0.05287500  |
| H | 2.52446700  | 0.62560900  | 0.46753000  |
| H | 3.44966900  | 1.63571600  | 1.58233700  |
| C | -5.27437700 | -0.41951700 | -0.35415700 |
| H | -6.14791200 | -0.43998300 | -1.00373600 |
| H | -4.96534400 | -1.43041000 | -0.08060500 |
| H | -4.42791000 | 0.02638200  | -0.88443700 |
| C | -5.58433400 | 0.40555200  | 0.88921500  |
| O | -4.66376500 | 0.39325300  | 1.83538100  |
| H | -3.83586900 | -0.21843100 | 1.60203100  |
| O | -6.61646400 | 1.04857700  | 0.99176300  |

**[THCA – H] ... Acetic Acid**

|   |             |             |             |
|---|-------------|-------------|-------------|
| O | 1.19558100  | -2.19954300 | -0.57129900 |
| O | 0.59803700  | 2.30299800  | 0.90289900  |
| O | -1.56221700 | 3.41709700  | 0.66005000  |
| O | -3.30689800 | 2.42286100  | -0.28337000 |
| C | 3.22740000  | -1.02246300 | -0.06925200 |
| C | 2.47205100  | 0.21135200  | 0.45543100  |
| C | 2.42959600  | -2.31311500 | 0.17718700  |
| C | 4.66787600  | -0.98002900 | 0.44939400  |
| C | 1.00919300  | 0.14412000  | 0.06292300  |

|   |             |             |             |
|---|-------------|-------------|-------------|
| C | 5.39398500  | 0.23450500  | -0.15428900 |
| C | 3.21400800  | 1.45488500  | -0.00006900 |
| C | 4.52436500  | 1.46946500  | -0.26547900 |
| C | 0.46929000  | -1.03041000 | -0.43629300 |
| C | 3.11200300  | -3.53815100 | -0.43090600 |
| C | 2.09889700  | -2.56165900 | 1.65477500  |
| C | 0.13244600  | 1.25573600  | 0.30111800  |
| C | -0.86923800 | -1.11693400 | -0.83971400 |
| C | -1.72334800 | -0.02824900 | -0.71228500 |
| C | 5.23664600  | 2.71760000  | -0.71997800 |
| C | -1.24795100 | 1.17396600  | -0.13046500 |
| C | -3.15838800 | -0.23567500 | -1.15817100 |
| C | -4.11406800 | -0.51882800 | 0.01299700  |
| C | -2.13134800 | 2.36578200  | 0.06388300  |
| C | -5.57232800 | -0.64275700 | -0.43365800 |
| C | -6.53971700 | -0.93789600 | 0.71688800  |
| C | -8.00007700 | -1.04543200 | 0.26584600  |
| H | 3.26716700  | -0.92884000 | -1.16352500 |
| H | 2.52110600  | 0.21184200  | 1.55712900  |
| H | 5.21637200  | -1.89354400 | 0.20062800  |
| H | 4.65677300  | -0.89978800 | 1.54254300  |
| H | 5.76493800  | -0.02133900 | -1.15889100 |
| H | 6.29132300  | 0.46894900  | 0.43494900  |
| H | 2.62568200  | 2.36134400  | -0.06543000 |
| H | 3.40041200  | -3.34019100 | -1.46651000 |
| H | 4.00159600  | -3.81823000 | 0.13779400  |
| H | 2.41568500  | -4.38020200 | -0.42332400 |
| H | 3.01443500  | -2.61723900 | 2.25076000  |
| H | 1.47108800  | -1.76416800 | 2.05385900  |
| H | 1.55640500  | -3.50497900 | 1.75728500  |
| H | -1.22412500 | -2.05956000 | -1.24033600 |
| H | 5.71623600  | 2.56470600  | -1.69638800 |
| H | 6.03507000  | 2.99738100  | -0.01965700 |
| H | 4.54907000  | 3.56160300  | -0.80721000 |
| H | -3.51785600 | 0.64420000  | -1.69141300 |
| H | -3.18493100 | -1.08771500 | -1.84905200 |
| H | -4.02870500 | 0.29661700  | 0.73471300  |
| H | -3.79952100 | -1.44109500 | 0.51943700  |
| H | -0.58506800 | 3.14178900  | 0.86873900  |
| H | -5.86920000 | 0.29291500  | -0.92382600 |
| H | -5.66269400 | -1.43345700 | -1.19279800 |
| H | -6.44597600 | -0.14755800 | 1.47111300  |
| H | -6.23937400 | -1.87014200 | 1.21243900  |
| H | -8.33267400 | -0.11364900 | -0.20356000 |
| H | -8.12574700 | -1.84705100 | -0.47046100 |
| H | -8.67127600 | -1.25478800 | 1.10543700  |
| C | -1.65116904 | 5.21647743  | -1.74078340 |
| H | -1.46911334 | 5.69990425  | -2.69784472 |
| H | -1.53159878 | 4.13481995  | -1.85315476 |
| H | -0.91330574 | 5.56602990  | -1.01256925 |
| C | -3.05455224 | 5.54762157  | -1.27256623 |
| O | -3.41470870 | 5.00044958  | -0.07448252 |
| H | -2.69481406 | 4.47414091  | 0.29301125  |
| O | -3.83228481 | 6.23398486  | -1.87063666 |

**[CBDA – H]<sup>+</sup> ... Acetic Acid**

|   |             |             |             |
|---|-------------|-------------|-------------|
| O | -1.09463700 | 1.26840000  | -0.44776100 |
| O | -1.77730500 | -3.37701100 | 0.11565100  |

|   |             |             |             |
|---|-------------|-------------|-------------|
| O | 2.97557300  | 1.03251100  | 0.00197200  |
| O | 1.12655300  | 2.25925500  | -0.29414200 |
| C | -3.59115500 | 0.02384100  | 0.81782100  |
| C | -2.96432200 | -0.83520800 | -0.32344600 |
| C | -5.06369400 | 0.30512400  | 0.47164900  |
| C | -5.17751400 | 1.13189900  | -0.81528400 |
| C | -3.32416700 | -0.27653500 | -1.68746700 |
| C | -1.46411400 | -1.03276000 | -0.16789600 |
| C | -4.30674800 | 0.59733900  | -1.93154300 |
| C | -3.39115300 | -0.62201800 | 2.18267300  |
| C | -0.56203800 | 0.05589200  | -0.22714300 |
| C | -0.92035900 | -2.29494300 | 0.07035100  |
| C | -4.57730100 | 1.15247900  | -3.30611200 |
| C | 1.34555200  | -1.40196100 | 0.20948200  |
| C | 0.84713400  | -0.10056900 | -0.04453000 |
| C | -2.24431800 | -0.08141600 | 3.00031400  |
| C | 0.45248700  | -2.47625700 | 0.26206200  |
| C | 2.81293800  | -1.73630200 | 0.39662900  |
| C | -4.16743100 | -1.62300100 | 2.63122100  |
| C | 3.56574500  | -1.85078500 | -0.94543400 |
| C | 5.04772500  | -2.26082400 | -0.79750000 |
| C | 1.74226500  | 1.12312400  | -0.11328900 |
| C | 5.33429100  | -3.76821500 | -0.97374200 |
| C | 4.61803400  | -4.67616300 | 0.02662500  |
| H | -3.05689300 | 0.97990600  | 0.81604100  |
| H | -3.41631400 | -1.83080400 | -0.24523700 |
| H | -5.59888000 | -0.64471800 | 0.34187600  |
| H | -5.55349700 | 0.82341800  | 1.30618400  |
| H | -6.22561800 | 1.16571100  | -1.14899000 |
| H | -4.89159200 | 2.17772200  | -0.61825400 |
| H | -2.70294100 | -0.62523500 | -2.50992900 |
| H | -4.46651900 | 2.24501200  | -3.31006600 |
| H | -3.89053300 | 0.74358200  | -4.05329500 |
| H | -5.60632500 | 0.93846000  | -3.62876200 |
| H | -2.37605900 | 0.99275200  | 3.18655700  |
| H | -2.15091700 | -0.59434300 | 3.96315200  |
| H | -1.30188200 | -0.18855600 | 2.45457600  |
| H | 0.83543200  | -3.47839600 | 0.45422500  |
| H | 2.88176000  | -2.68315100 | 0.94320600  |
| H | 3.30490300  | -0.96323500 | 0.99285200  |
| H | -4.98253900 | -2.02924900 | 2.04368500  |
| H | -3.98948900 | -2.08331900 | 3.60048500  |
| H | 3.04496800  | -2.56825200 | -1.59543400 |
| H | 3.50388000  | -0.87240600 | -1.42816000 |
| H | 5.64578600  | -1.72052200 | -1.54119400 |
| H | 5.41867000  | -1.93271600 | 0.18163200  |
| H | -0.28704100 | 1.90819400  | -0.43071900 |
| H | -1.26573400 | -4.16540900 | 0.33383100  |
| H | 5.04472000  | -4.06215600 | -1.99189500 |
| H | 6.41749600  | -3.93140700 | -0.90039700 |
| H | 4.91724400  | -5.72558800 | -0.10285500 |
| H | 3.53329400  | -4.62928000 | -0.08369100 |
| H | 4.85662000  | -4.39308700 | 1.06224400  |
| C | 3.18848900  | 3.93826300  | 1.56102600  |
| H | 3.84914300  | 4.34472400  | 2.32964800  |
| H | 3.53040700  | 2.95402900  | 1.22425700  |
| H | 2.18172800  | 3.79455600  | 1.96780000  |
| C | 3.13686000  | 4.89919000  | 0.38578000  |
| O | 2.38290800  | 4.51593800  | -0.64682000 |
| H | 1.95369400  | 3.61050500  | -0.50165200 |
| O | 3.73938200  | 5.96366900  | 0.37045000  |

[THC - H] ... ACE

|   |             |             |             |
|---|-------------|-------------|-------------|
| O | -1.78116700 | -1.96066500 | 1.04390700  |
| O | -0.32590800 | 0.39208000  | -2.89961600 |
| C | -3.22596900 | -0.12607700 | 0.38999400  |
| C | -2.39679800 | 0.14785800  | -0.88853000 |
| C | -3.15072900 | -1.62654200 | 0.75406100  |
| C | -2.74359300 | 0.77935500  | 1.53566100  |
| C | -1.09347900 | -0.64816200 | -0.89087300 |
| C | -2.91796000 | 2.25970700  | 1.19077700  |
| C | -2.18596600 | 1.63380900  | -1.10071800 |
| C | -2.43396200 | 2.58816700  | -0.19973600 |
| C | -0.84440900 | -1.62001700 | 0.07221200  |
| C | -3.91149900 | -1.96958000 | 2.03706300  |
| C | -3.67072400 | -2.51556800 | -0.38978400 |
| C | -0.12006500 | -0.43117500 | -1.94861100 |
| C | 0.36439700  | -2.32543900 | 0.15039900  |
| C | 1.34344700  | -2.09157900 | -0.82067100 |
| C | -2.22419600 | 4.05005700  | -0.49956300 |
| C | 1.09483600  | -1.18748100 | -1.84632400 |
| C | 2.67475800  | -2.81872600 | -0.75616900 |
| C | 3.88233200  | -1.88428000 | -0.54504600 |
| C | 3.85219800  | -1.13027300 | 0.78693800  |
| C | 4.99069000  | -0.11714500 | 0.94112200  |
| C | 4.94192300  | 0.64475600  | 2.26894600  |
| H | -4.27666000 | 0.11722600  | 0.17994200  |
| H | -2.98128600 | -0.18215700 | -1.76108800 |
| H | -1.68736800 | 0.56678100  | 1.72252700  |
| H | -3.28194300 | 0.56085000  | 2.46125400  |
| H | -2.37720400 | 2.87610700  | 1.92225400  |
| H | -3.97610100 | 2.55101700  | 1.28699000  |
| H | -1.78136500 | 1.88490500  | -2.07369800 |
| H | -3.46107000 | -1.48334300 | 2.90229000  |
| H | -4.95724000 | -1.65745000 | 1.95734800  |
| H | -3.87988600 | -3.04881900 | 2.20671900  |
| H | -4.71166300 | -2.26759100 | -0.62034900 |
| H | -3.07355800 | -2.39322200 | -1.29296800 |
| H | -3.61767700 | -3.56521400 | -0.08927700 |
| H | 0.50048700  | -3.05186200 | 0.94290100  |
| H | -1.46426400 | 4.48284000  | 0.16464700  |
| H | -3.14612700 | 4.62499700  | -0.33667500 |
| H | -1.90162600 | 4.20594300  | -1.53153600 |
| H | 2.64890500  | -3.55822300 | 0.05346800  |
| H | 2.82772000  | -3.37891700 | -1.68726400 |
| H | 3.91554000  | -1.15943800 | -1.36669500 |
| H | 4.81092900  | -2.46854600 | -0.61100600 |
| H | 2.89160000  | -0.61708100 | 0.88484300  |
| H | 3.89069000  | -1.85324500 | 1.61377700  |
| H | 4.94392100  | 0.60262900  | 0.11532600  |
| H | 5.95426300  | -0.63599100 | 0.84403300  |
| H | 4.96760600  | -0.04628700 | 3.11935900  |
| H | 5.78775900  | 1.33255500  | 2.36702400  |
| H | 4.02933100  | 1.24207800  | 2.33775000  |
| H | 1.82725600  | -1.02615700 | -2.63233400 |
| C | 2.14744900  | 2.31030700  | 0.09621700  |
| C | 1.03910300  | 1.58888500  | 0.82194700  |
| H | 1.16471900  | 1.68458300  | 1.90085400  |
| H | 0.98465800  | 0.53955200  | 0.52201500  |
| H | 0.08118100  | 2.02188100  | 0.51604800  |

|   |            |            |             |
|---|------------|------------|-------------|
| C | 2.25193200 | 2.05221000 | -1.38570900 |
| H | 2.67491000 | 1.05104800 | -1.52250000 |
| H | 1.27390200 | 2.00339400 | -1.87500800 |
| H | 2.90241800 | 2.79288800 | -1.85239500 |
| O | 2.92144500 | 3.05281800 | 0.67943700  |

**[CBD - H] ... ACE**

|   |             |             |             |
|---|-------------|-------------|-------------|
| O | 1.41021700  | -0.55666700 | -2.38886600 |
| O | 0.20908700  | -0.49115600 | 2.22254600  |
| C | 3.43485900  | -0.48285200 | 0.02223500  |
| C | 2.10875600  | 0.29569200  | 0.24094400  |
| C | 4.62189700  | 0.47333500  | 0.26132100  |
| C | 4.61549700  | 1.61489400  | -0.76158600 |
| C | 2.14624600  | 1.62138500  | -0.48865100 |
| C | 0.87073800  | -0.52138900 | -0.07171100 |
| C | 3.24598400  | 2.22838500  | -0.94254700 |
| C | 3.54190400  | -1.73910100 | 0.86529900  |
| C | 0.54409900  | -0.91904200 | -1.35967300 |
| C | -0.00664000 | -0.88553600 | 1.02574500  |
| C | 3.20106800  | 3.53120900  | -1.69667600 |
| C | 3.33825700  | -1.60653900 | 2.35269800  |
| C | -1.46507700 | -2.03315800 | -0.61705800 |
| C | -0.61392500 | -1.65008400 | -1.66104100 |
| C | -1.15137500 | -1.68045600 | 0.68727800  |
| C | -2.75179400 | -2.77804900 | -0.92232700 |
| C | 3.80885500  | -2.91822600 | 0.29483100  |
| C | -4.01986100 | -2.01869900 | -0.48240000 |
| C | -4.14189900 | -0.61959800 | -1.09224900 |
| C | -5.36869400 | 0.15653800  | -0.60362700 |
| C | -5.43190300 | 1.58453500  | -1.15450500 |
| H | 3.46274700  | -0.78285700 | -1.02979100 |
| H | 2.01635900  | 0.52179900  | 1.31071200  |
| H | 5.56618700  | -0.07972300 | 0.20770600  |
| H | 4.55107200  | 0.89439800  | 1.27097200  |
| H | 4.97229000  | 1.24602900  | -1.73586500 |
| H | 5.33111600  | 2.39363500  | -0.46122900 |
| H | 1.17994800  | 2.09276700  | -0.64903600 |
| H | 3.78757000  | 4.30874600  | -1.18876600 |
| H | 2.17734300  | 3.89654900  | -1.81095900 |
| H | 3.63432700  | 3.41817700  | -2.70014700 |
| H | 3.54740200  | -2.54980900 | 2.86451900  |
| H | 3.99291300  | -0.83554500 | 2.77569400  |
| H | 2.30605500  | -1.30691500 | 2.57006100  |
| H | -0.84291700 | -1.91182000 | -2.69158000 |
| H | -1.79489600 | -1.97609200 | 1.50973800  |
| H | -2.80986600 | -2.97538200 | -1.99978800 |
| H | -2.74104800 | -3.75670800 | -0.42606700 |
| H | 3.90779200  | -3.01600000 | -0.78180800 |
| H | 3.90250900  | -3.82669700 | 0.88282400  |
| H | -4.01991700 | -1.93050400 | 0.61007300  |
| H | -4.90714000 | -2.61254700 | -0.74241100 |
| H | -3.23490200 | -0.05350100 | -0.85758300 |
| H | -4.17034600 | -0.69851500 | -2.18779700 |
| H | 1.04196400  | -0.89031800 | -3.21214900 |
| H | -5.35550500 | 0.19635100  | 0.49212500  |
| H | -6.28039200 | -0.39055900 | -0.87933000 |
| H | -5.43458100 | 1.58287500  | -2.25034100 |
| H | -6.33229700 | 2.10645700  | -0.81594200 |

|   |             |            |             |
|---|-------------|------------|-------------|
| H | -4.57110000 | 2.16924300 | -0.81890400 |
| C | -2.58207500 | 2.12508200 | 1.60054100  |
| C | -1.35750300 | 2.14134400 | 0.71993600  |
| H | -1.27484800 | 3.09376200 | 0.19600800  |
| H | -0.46899300 | 1.94155700 | 1.32684800  |
| H | -1.39469500 | 1.31175000 | 0.00661400  |
| C | -2.80724500 | 0.85583700 | 2.38483100  |
| H | -3.56052200 | 1.01745600 | 3.15702400  |
| H | -3.15692600 | 0.08743100 | 1.68775600  |
| H | -1.86536500 | 0.46762200 | 2.78851500  |
| O | -3.34959900 | 3.07205300 | 1.66290200  |

**[CBC - H] ... ACE**

|   |             |             |             |
|---|-------------|-------------|-------------|
| O | 1.27450500  | -0.90889900 | -1.42736200 |
| O | -0.72547700 | -0.95514000 | 2.92945500  |
| C | 2.22489000  | -1.96773300 | -1.12624900 |
| C | 3.61835900  | -1.31946700 | -0.93580300 |
| C | 1.79930200  | -2.77714500 | 0.07823200  |
| C | 0.56821500  | -0.30056800 | -0.40556300 |
| C | 2.23570900  | -2.83591300 | -2.38924000 |
| C | 3.72337100  | -0.34676200 | 0.25046700  |
| C | 0.38189800  | -0.94777200 | 0.81920900  |
| C | -0.76024300 | 1.57295000  | 0.31106200  |
| C | 0.95049600  | -2.26148900 | 0.98452200  |
| C | -1.40442900 | 2.91754400  | 0.02193700  |
| C | 0.00398900  | 0.93927800  | -0.68997200 |
| C | -2.94568200 | 2.87865200  | 0.02392300  |
| C | -0.44569500 | -0.34847700 | 1.85270200  |
| C | -0.95581500 | 0.96277500  | 1.53979900  |
| C | -3.54039700 | 1.94074000  | -1.02983400 |
| C | 5.09518400  | 0.25252500  | 0.36042200  |
| C | -5.06792000 | 1.84463900  | -0.96982800 |
| C | 5.44893400  | 1.53691200  | 0.22139000  |
| C | -5.65021800 | 0.88010800  | -2.00770600 |
| C | 6.88916700  | 1.97170900  | 0.35417800  |
| C | 4.48765000  | 2.66303900  | -0.06823300 |
| H | 4.35766900  | -2.12355900 | -0.81904700 |
| H | 3.86649900  | -0.78403600 | -1.86034100 |
| H | 2.22812000  | -3.76913400 | 0.18195900  |
| H | 1.24435700  | -3.26403300 | -2.54921700 |
| H | 2.50294200  | -2.23283500 | -3.26152700 |
| H | 2.95976000  | -3.64996300 | -2.28729700 |
| H | 3.48455100  | -0.89128300 | 1.17057600  |
| H | 2.96041200  | 0.42361500  | 0.14965500  |
| H | 0.65714000  | -2.81071000 | 1.87348800  |
| H | -1.07358100 | 3.64879500  | 0.76988700  |
| H | -1.05819200 | 3.28636600  | -0.95091400 |
| H | 0.15793900  | 1.39004800  | -1.66312200 |
| H | -3.33371600 | 3.89485600  | -0.13214600 |
| H | -3.29078700 | 2.56747300  | 1.01670000  |
| H | -1.54751600 | 1.44863300  | 2.31012100  |
| H | -3.23325800 | 2.27610000  | -2.03003600 |
| H | -3.10780100 | 0.94368400  | -0.90532000 |
| H | 5.89291600  | -0.46449800 | 0.56262900  |
| H | -5.50037300 | 2.84522900  | -1.10628100 |
| H | -5.36672200 | 1.51518400  | 0.03254900  |
| H | -6.74381700 | 0.85927500  | -1.96534500 |
| H | -5.35784300 | 1.17292400  | -3.02245900 |
| H | -5.29813000 | -0.13941100 | -1.83077300 |
| H | 7.55304300  | 1.12907700  | 0.56326200  |
| H | 7.23780300  | 2.46215800  | -0.56405800 |

|   |             |             |             |
|---|-------------|-------------|-------------|
| H | 7.00477100  | 2.70569300  | 1.16214900  |
| H | 3.45649500  | 2.33138700  | -0.18369600 |
| H | 4.51397500  | 3.40627000  | 0.73855000  |
| H | 4.78048200  | 3.18798400  | -0.98643800 |
| C | -4.04718800 | -1.62190000 | 0.57745300  |
| C | -2.76048500 | -1.96658600 | -0.13240800 |
| H | -2.96934100 | -2.49131600 | -1.06470600 |
| H | -2.17069700 | -1.06559300 | -0.32276400 |
| H | -2.13223500 | -2.58116500 | 0.51923500  |
| C | -3.91491500 | -0.81192900 | 1.84371300  |
| H | -3.65676400 | 0.21390800  | 1.56073900  |
| H | -4.85864500 | -0.81349400 | 2.39047200  |
| H | -3.07846000 | -1.15094800 | 2.46434200  |
| O | -5.13478600 | -1.96189300 | 0.13967400  |

**[THCA - H] ... ACE**

|   |             |             |             |
|---|-------------|-------------|-------------|
| O | 2.24934300  | -2.35007600 | -0.65958400 |
| O | 0.25746400  | 1.07928200  | 1.98716000  |
| O | -2.09020200 | 1.00204700  | 2.56068300  |
| O | -3.48095600 | -0.49489800 | 1.70759900  |
| C | 3.58806300  | -0.37263900 | -0.39914000 |
| C | 2.59055400  | 0.26651700  | 0.58275000  |
| C | 3.57829500  | -1.90549400 | -0.28696600 |
| C | 4.94061600  | 0.33223100  | -0.26117000 |
| C | 1.27041700  | -0.47779300 | 0.54838100  |
| C | 4.80179600  | 1.79622900  | -0.71327000 |
| C | 2.50486100  | 1.75094600  | 0.27749600  |
| C | 3.49566900  | 2.43989000  | -0.29739900 |
| C | 1.17199600  | -1.70841000 | -0.08468500 |
| C | 4.48536400  | -2.56650400 | -1.32388000 |
| C | 3.90188200  | -2.42499900 | 1.11950800  |
| C | 0.12856400  | 0.01523500  | 1.25367300  |
| C | -0.04464300 | -2.39242800 | -0.17869600 |
| C | -1.20692500 | -1.87561500 | 0.38232100  |
| C | 3.37826800  | 3.91205000  | -0.59694500 |
| C | -1.14273200 | -0.66937000 | 1.12641300  |
| C | -2.47442000 | -2.67652200 | 0.11243500  |
| C | -3.00146800 | -2.45915300 | -1.32627800 |
| C | -2.33177900 | -0.07643400 | 1.81201700  |
| C | -3.54938500 | -1.04119900 | -1.61116500 |
| C | -5.08241900 | -0.95460300 | -1.68959700 |
| C | -5.80577400 | -1.36701200 | -0.40247000 |
| H | 3.21198900  | -0.16874700 | -1.41140500 |
| H | 2.99641100  | 0.18227000  | 1.60410700  |
| H | 5.71740300  | -0.16027400 | -0.85356800 |
| H | 5.26325200  | 0.29577100  | 0.78575800  |
| H | 4.88274900  | 1.85160900  | -1.80965200 |
| H | 5.64192400  | 2.39118000  | -0.32987700 |
| H | 1.59591200  | 2.25071300  | 0.58457600  |
| H | 4.29551700  | -2.15281000 | -2.31755400 |
| H | 5.53905200  | -2.42258700 | -1.07510100 |
| H | 4.27919800  | -3.63909300 | -1.35309900 |
| H | 4.88656300  | -2.07470600 | 1.44190700  |
| H | 3.15835500  | -2.08685200 | 1.84222700  |
| H | 3.90239000  | -3.51792500 | 1.11793300  |
| H | -0.05740800 | -3.34007600 | -0.70520000 |
| H | 3.51901400  | 4.10784300  | -1.66822400 |
| H | 4.15013800  | 4.48746500  | -0.06898200 |
| H | 2.40156600  | 4.30441700  | -0.30635300 |



|   |             |             |             |
|---|-------------|-------------|-------------|
| H | -2.22771100 | -3.73935200 | 0.22352900  |
| H | -3.24988400 | -2.43046200 | 0.83136300  |
| H | -3.78533300 | -3.20124700 | -1.52766200 |
| H | -2.18613400 | -2.68337000 | -2.02180800 |
| H | -1.06413300 | 1.19820700  | 2.47082700  |
| H | -3.19605700 | -0.36316500 | -0.83209300 |
| H | -3.13679900 | -0.67063600 | -2.55628500 |
| H | -5.43188600 | -1.57791800 | -2.52497200 |
| H | -5.36220100 | 0.07596300  | -1.94308800 |
| H | -6.88985600 | -1.25027800 | -0.50917400 |
| H | -5.60892300 | -2.41486100 | -0.15548700 |
| H | -5.46321000 | -0.77126700 | 0.44503300  |
| C | -2.66017000 | 3.22709300  | -0.73782900 |
| C | -1.35938600 | 2.45991500  | -0.72307500 |
| H | -1.52619400 | 1.40160200  | -0.94309100 |
| H | -0.65659400 | 2.88754600  | -1.43795100 |
| H | -0.92444300 | 2.48169500  | 0.28171200  |
| C | -3.77990500 | 2.66402300  | 0.10764600  |
| H | -4.09566200 | 1.69740500  | -0.29697200 |
| H | -3.43473100 | 2.45439900  | 1.12423900  |
| H | -4.62587500 | 3.35171200  | 0.11444200  |
| O | -2.79845200 | 4.24740700  | -1.39092200 |

**[CBDA - H] ... ACE**

|   |             |             |             |
|---|-------------|-------------|-------------|
| O | -0.61387500 | -0.58468500 | -1.60215300 |
| O | -0.87782600 | -0.63428400 | 3.13009200  |
| O | 3.18696600  | 0.83794600  | -1.72404000 |
| O | 1.42799700  | -0.03328200 | -2.76587100 |
| C | -3.18124900 | -0.05728500 | -0.05766800 |
| C | -2.24567800 | -1.05988500 | 0.67252900  |
| C | -4.58224900 | -0.69431300 | -0.18790000 |
| C | -4.53054500 | -1.95365000 | -1.06313000 |
| C | -2.36383000 | -2.44357900 | 0.05691800  |
| C | -0.79497500 | -0.61003700 | 0.74621100  |
| C | -3.37658300 | -2.86543000 | -0.71087400 |
| C | -3.24783400 | 1.30992200  | 0.59856800  |
| C | -0.03228300 | -0.41088100 | -0.45196500 |
| C | -0.15091100 | -0.43581700 | 1.96344300  |
| C | -3.40740300 | -4.24028500 | -1.32787400 |
| C | 1.96973400  | 0.13018100  | 0.90188800  |
| C | 1.36358300  | -0.00975400 | -0.36938100 |
| C | -3.51661900 | 1.37532600  | 2.08411200  |
| C | 1.20048300  | -0.07510900 | 2.04866200  |
| C | 3.44009700  | 0.44876500  | 1.14301000  |
| C | -3.09748900 | 2.42430400  | -0.13090800 |
| C | 4.23538700  | -0.77007000 | 1.67000300  |
| C | 4.31140500  | -1.96400000 | 0.70278000  |
| C | 2.07980700  | 0.29359400  | -1.65354000 |
| C | 5.10254400  | -1.71994800 | -0.59452800 |
| C | 6.58779400  | -1.40610800 | -0.36890400 |
| H | -2.77720600 | 0.07034800  | -1.06625500 |
| H | -2.59996400 | -1.14970900 | 1.70683600  |
| H | -4.96092000 | -0.96104700 | 0.80914300  |
| H | -5.28260300 | 0.03455900  | -0.61367500 |
| H | -5.47884000 | -2.50774900 | -0.98518400 |
| H | -4.43868600 | -1.66599700 | -2.12309700 |
| H | -1.53604100 | -3.12054700 | 0.26533600  |
| H | -3.43670600 | -4.17271300 | -2.42517900 |
| H | -2.52680800 | -4.82921400 | -1.05163300 |
| H | -4.30509200 | -4.79782100 | -1.02240600 |

|   |             |             |             |
|---|-------------|-------------|-------------|
| H | -3.66434300 | 2.40840500  | 2.41441800  |
| H | -4.41098500 | 0.79810400  | 2.35344400  |
| H | -2.68305200 | 0.94624800  | 2.65090100  |
| H | 1.65948800  | 0.04023800  | 3.03000700  |
| H | 3.49653900  | 1.24001400  | 1.90408800  |
| H | 3.89604000  | 0.83603700  | 0.23502300  |
| H | -3.15762900 | 3.41642400  | 0.30889300  |
| H | -2.87580900 | 2.37705400  | -1.19350900 |
| H | 5.24931300  | -0.43575300 | 1.93025700  |
| H | 3.77856300  | -1.11568100 | 2.60743100  |
| H | 4.76119700  | -2.81537600 | 1.23737500  |
| H | 3.28873200  | -2.26507900 | 0.44224600  |
| H | 0.46402600  | -0.34631400 | -2.46063300 |
| H | -0.29104700 | -0.48001300 | 3.88066800  |
| H | 5.02015900  | -2.61989100 | -1.21969900 |
| H | 4.63998300  | -0.90765900 | -1.16344500 |
| H | 6.72322600  | -0.45629000 | 0.16051400  |
| H | 7.12130900  | -1.32398700 | -1.32312200 |
| H | 7.07770100  | -2.19048500 | 0.22491700  |
| C | -0.14720000 | 3.84452300  | -0.62468200 |
| C | 0.04341700  | 3.02613000  | -1.88078700 |
| H | 1.11089300  | 2.84219300  | -2.05029500 |
| H | -0.41943400 | 2.03927100  | -1.77413300 |
| H | -0.38130200 | 3.55050900  | -2.73914600 |
| C | 0.31293600  | 3.20780200  | 0.66771000  |
| H | 1.36277300  | 2.90629500  | 0.59107000  |
| H | 0.17191000  | 3.90122700  | 1.49948800  |
| H | -0.25360000 | 2.28699700  | 0.84405300  |
| O | -0.64523800 | 4.96443200  | -0.64888500 |
